# Supplementary material for: Evolutionarily diverse caveolins share a common structural framework built around amphipathic discs
Source: bioRxiv or medRxiv preprint supplement (doi:10.1101/2022.11.15.516482), 2024-11-03

**Supplementary materials for**

**Design principles of caveolins across metazoa and beyond**

**Bing Han**<sup>1,2</sup>, **Louis F. L. Wilson**<sup>2,3</sup>, **Alican Gulsevin**<sup>4</sup>, **Jens Meiler**<sup>4,5</sup>, **Erkan Karakas**<sup>6</sup>, and **Anne K. Kenworthy**<sup>1,2,\*</sup>

<sup>1</sup> Center for Membrane and Cell Physiology, University of Virginia, Charlottesville, VA USA.

<sup>2</sup> Department of Molecular Physiology and Biological Physics, University of Virginia School of Medicine, Charlottesville, VA, USA

<sup>3</sup> Howard Hughes Medical Institute, University of Virginia School of Medicine, Charlottesville, VA, USA

<sup>4</sup> Department of Chemistry, Vanderbilt University Nashville, TN, USA

<sup>5</sup> Institute for Drug Discovery, Leipzig University, Germany

<sup>6</sup> Department of Molecular Physiology and Biophysics, Vanderbilt University Nashville, TN, USA

\*Correspondence: [akk7hp@virginia.edu](mailto:akk7hp@virginia.edu)

Figure S1

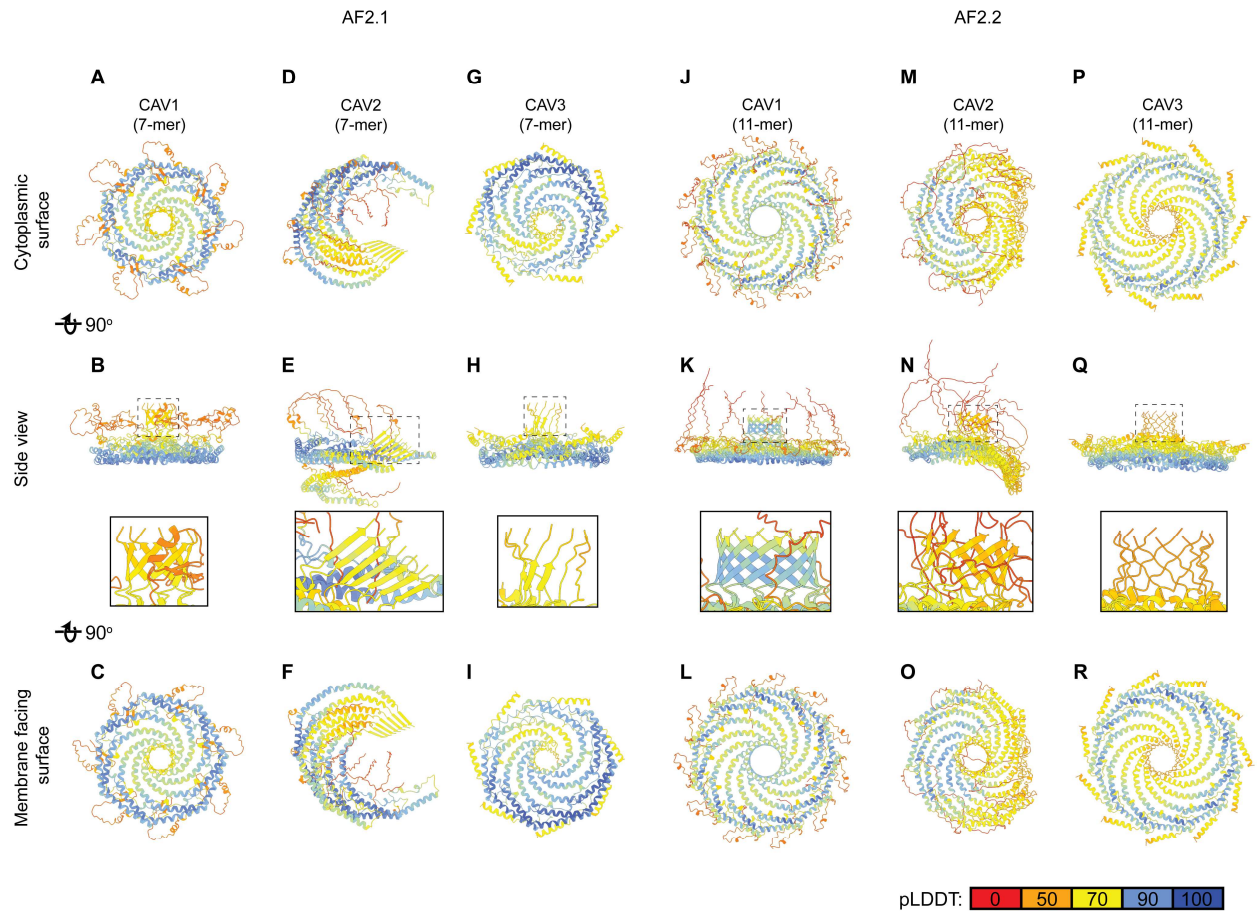

Figure S2

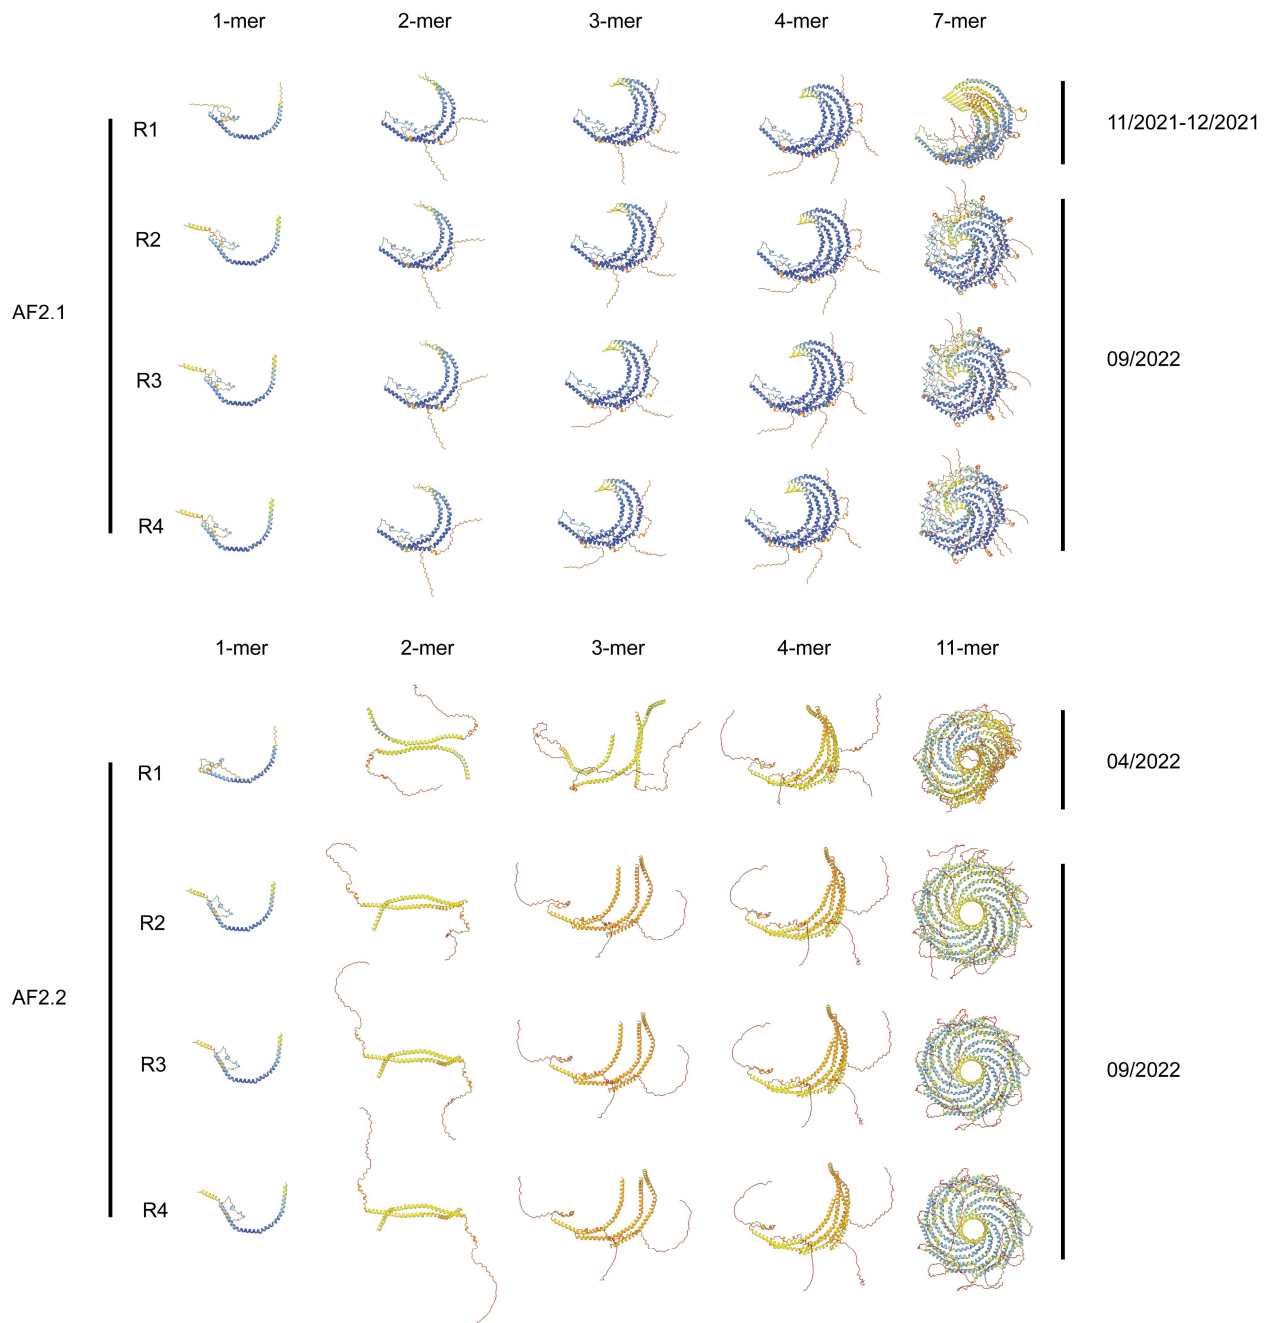

Figure S3

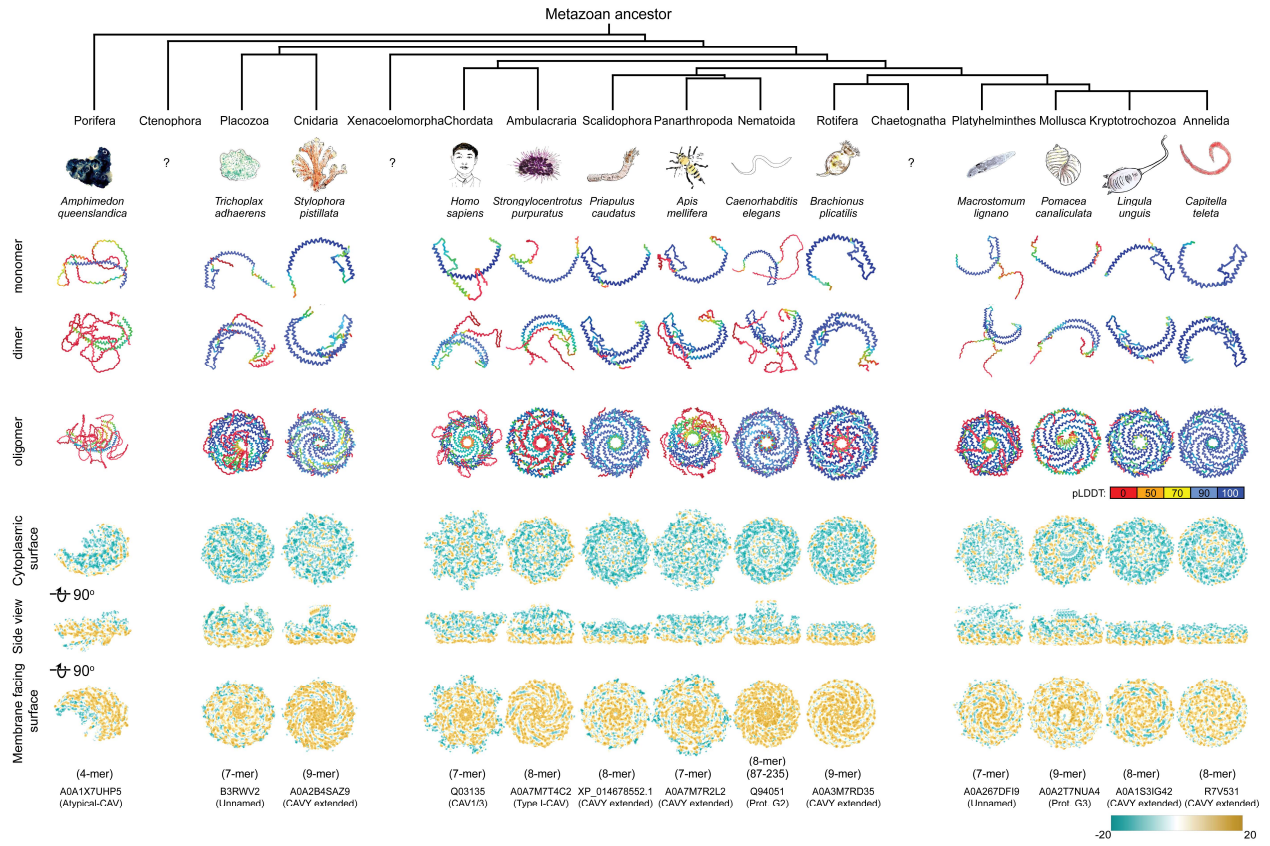

Figure S4

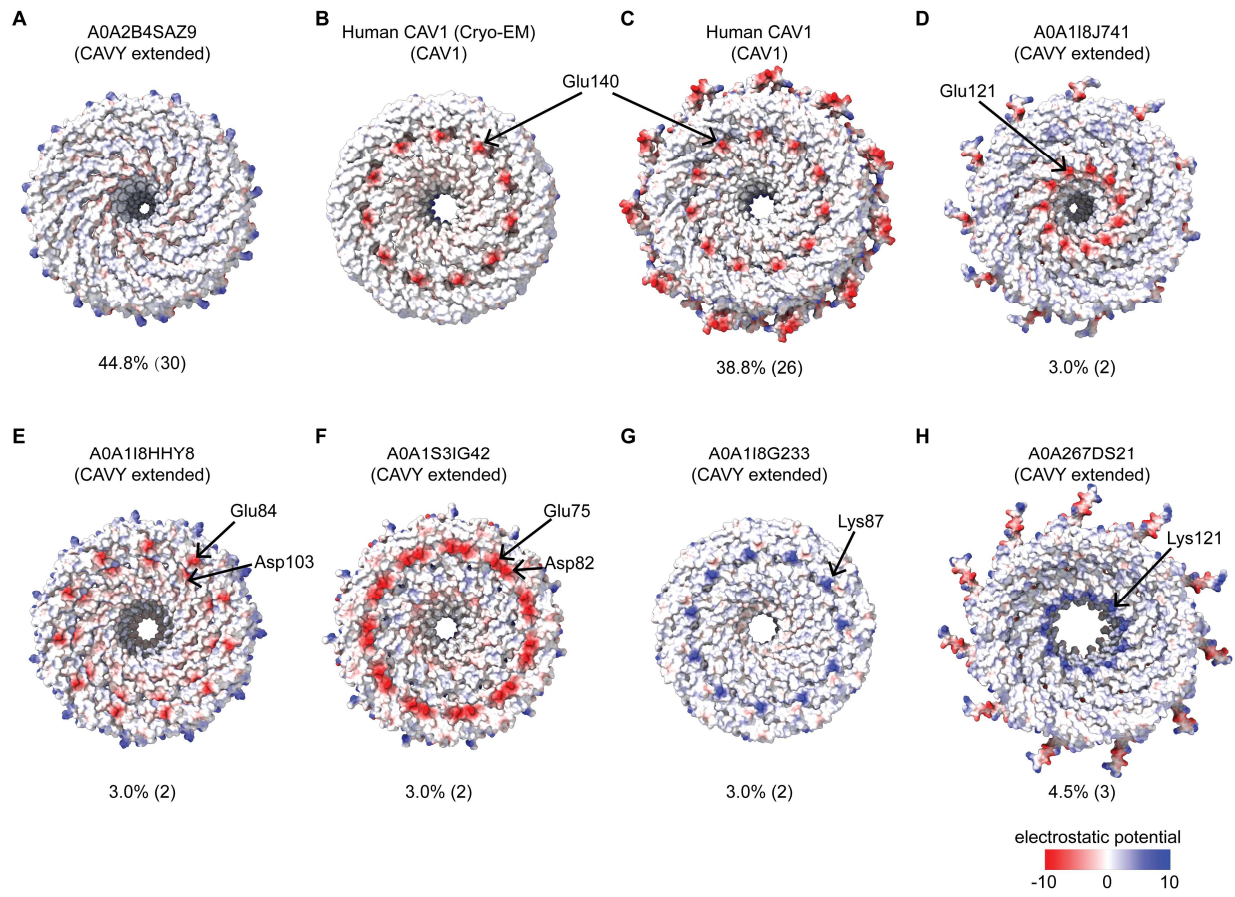

Figure S5

A

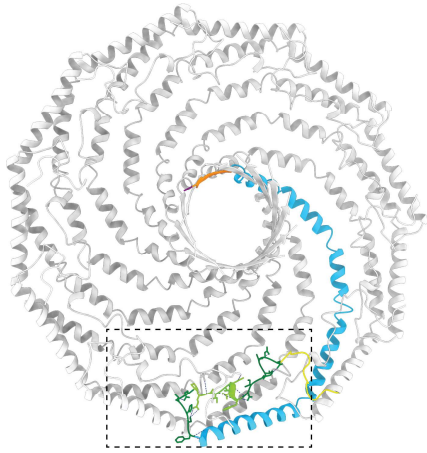

B

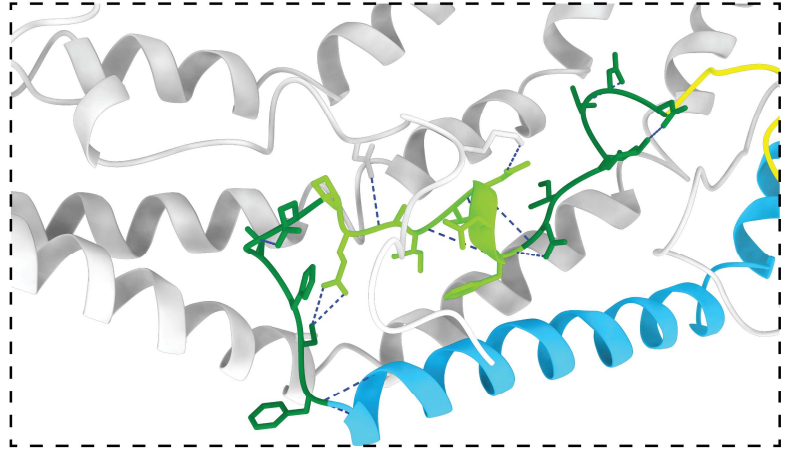

- N-term variable region
- Pin motif
- Hook structure ■ Signature motif
- Bow-like long helices region
- C-term sheet
- C-term variable region
- Hydrogen bond

Figure S6

A

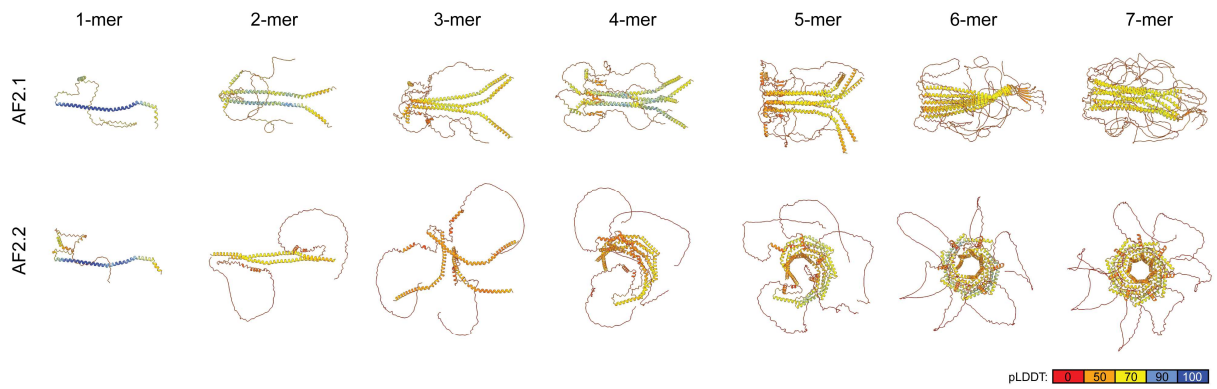

B

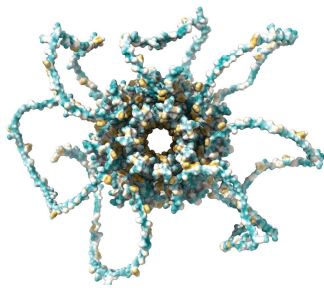

C

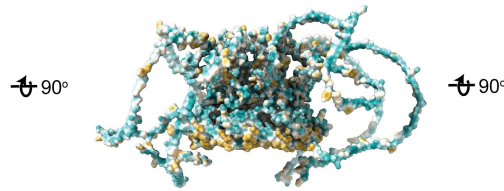

D

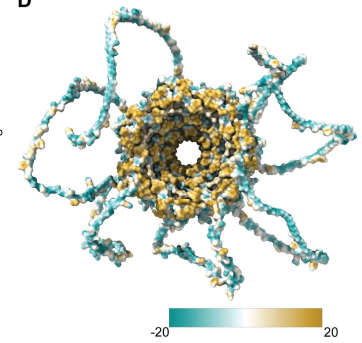

Figure S7

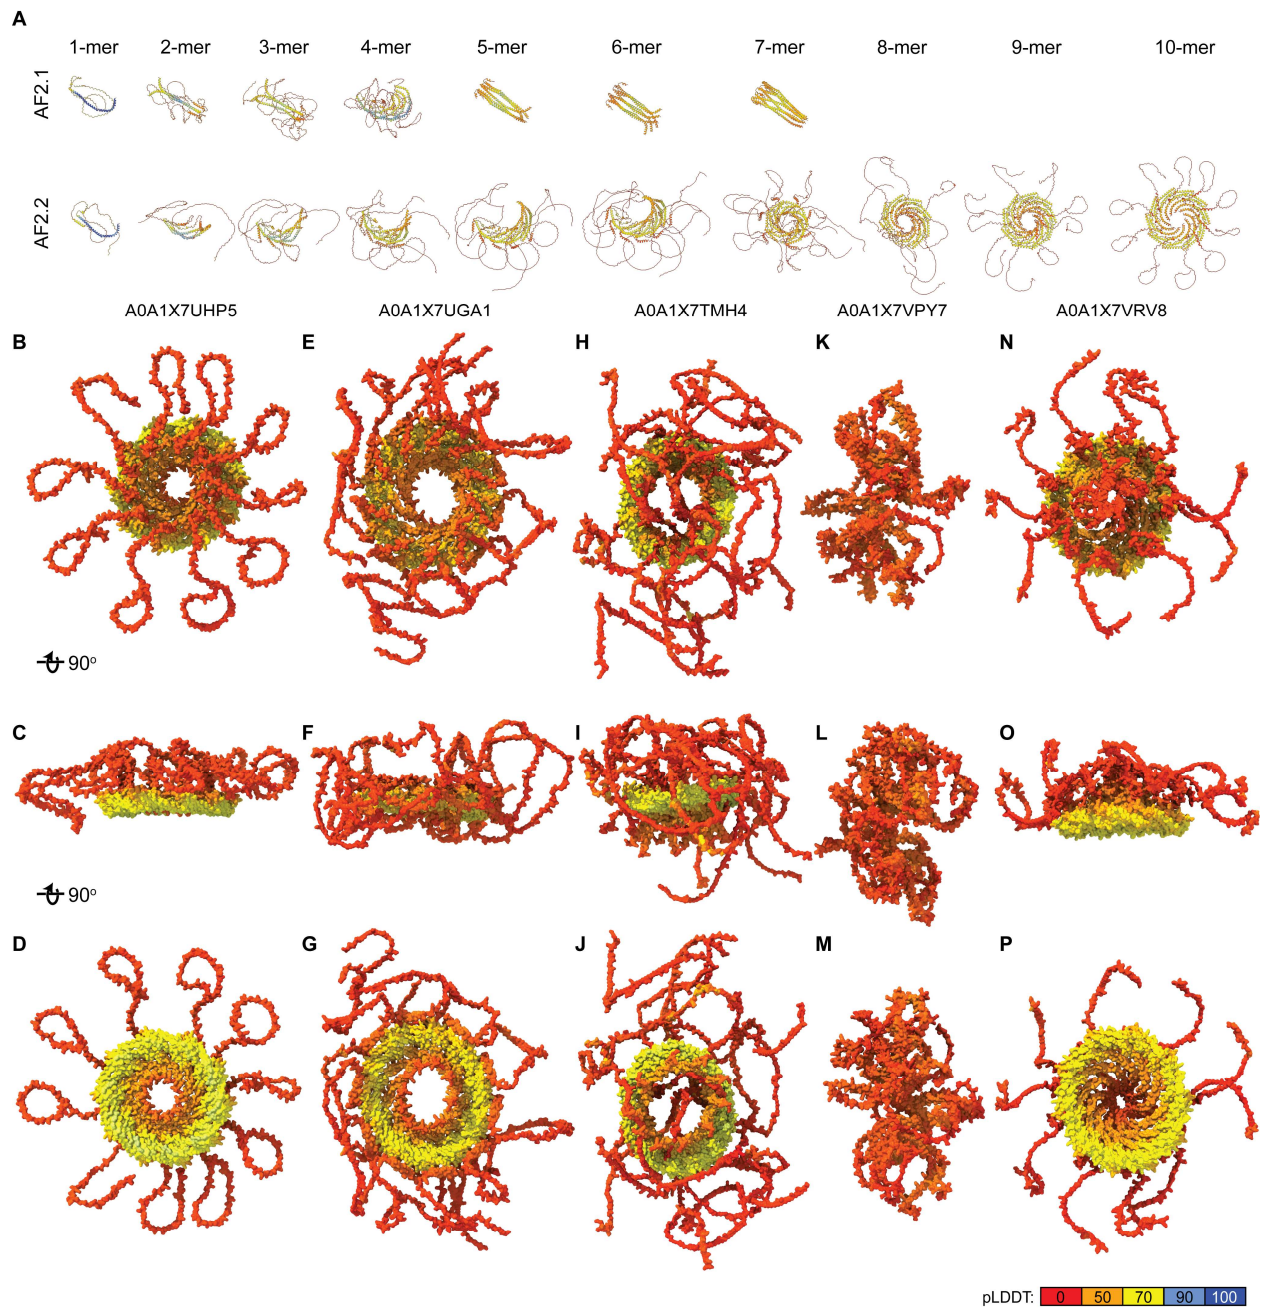



Figure S8

A

R7U639  
(Type I-CAV/CAV-like)

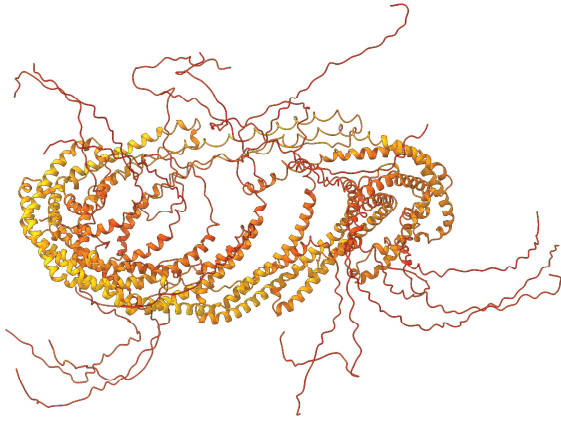

B

A0A267DC90  
(Type II-CAV, CAVY extended)

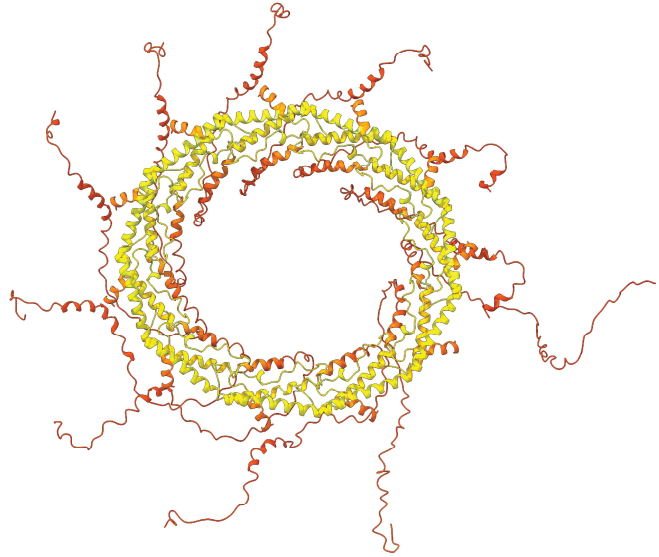

C

Human CAV1  $\Delta$ C

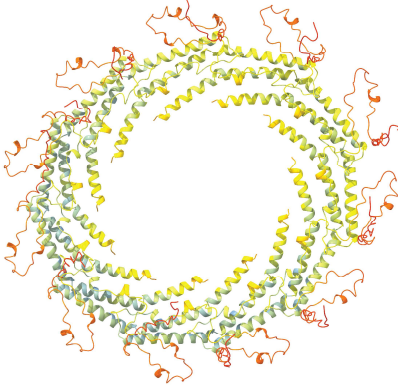

D

Human CAV1  $\Delta$ N &  $\Delta$ C

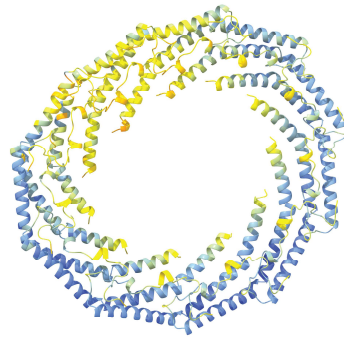

pLDDT: 0 50 70 90 100

Figure S9

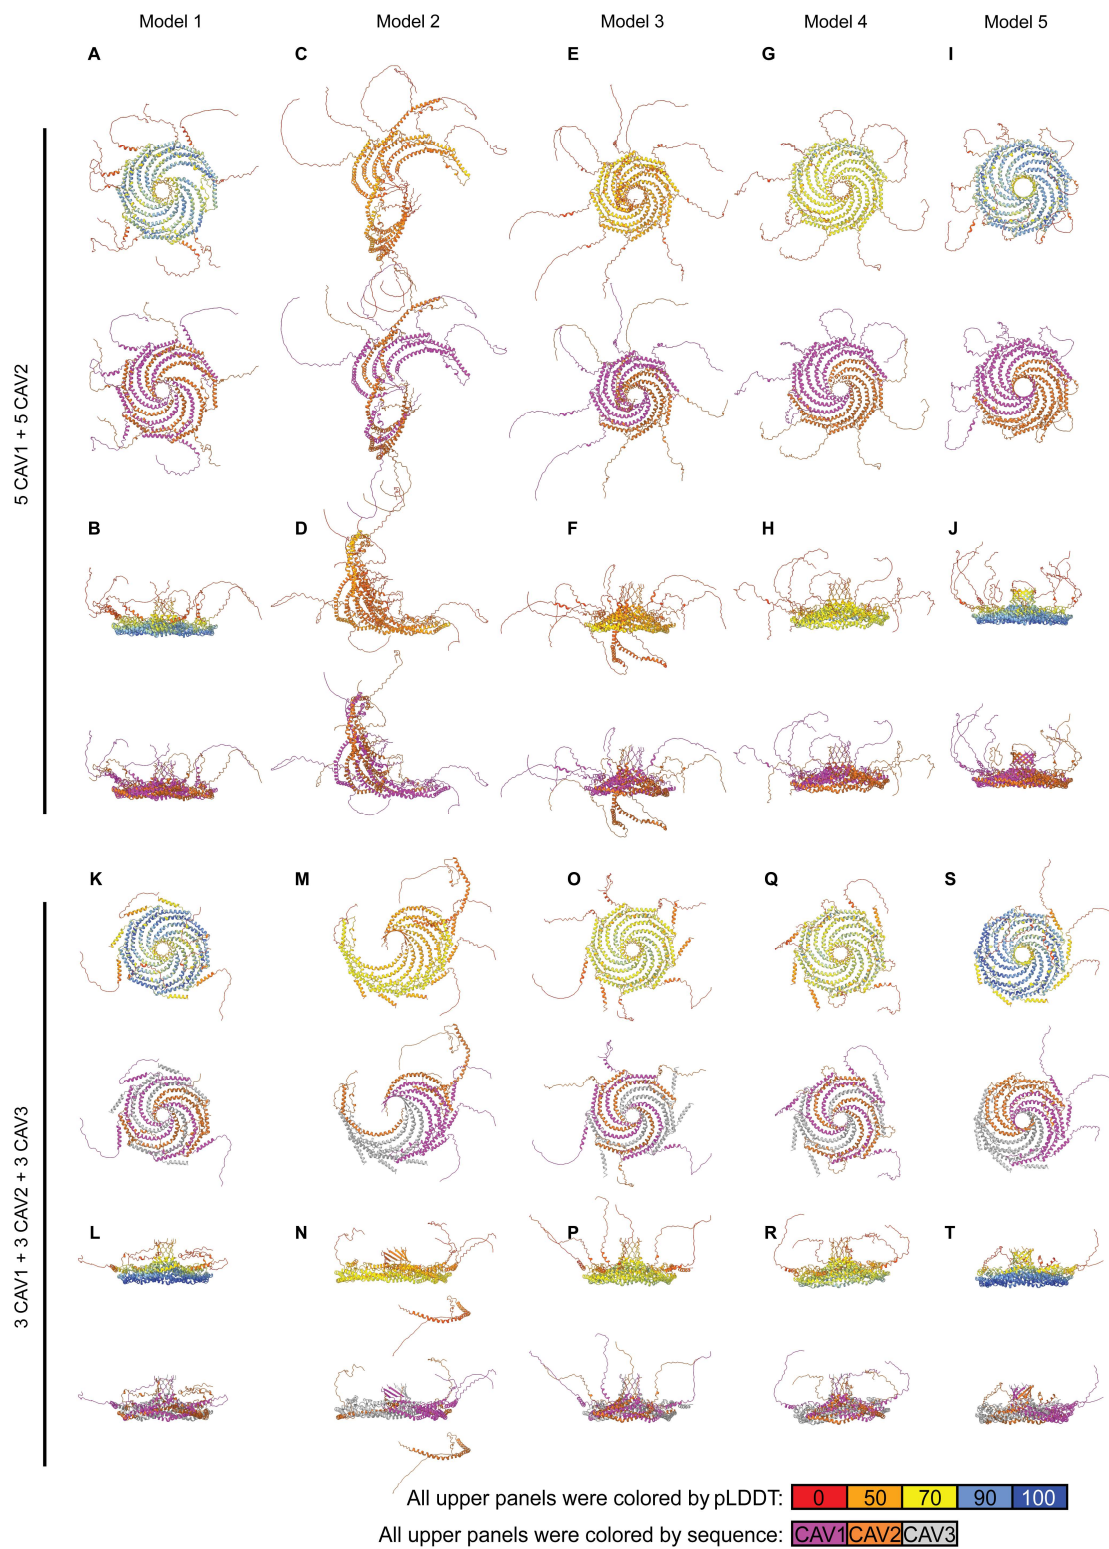

Figure S10

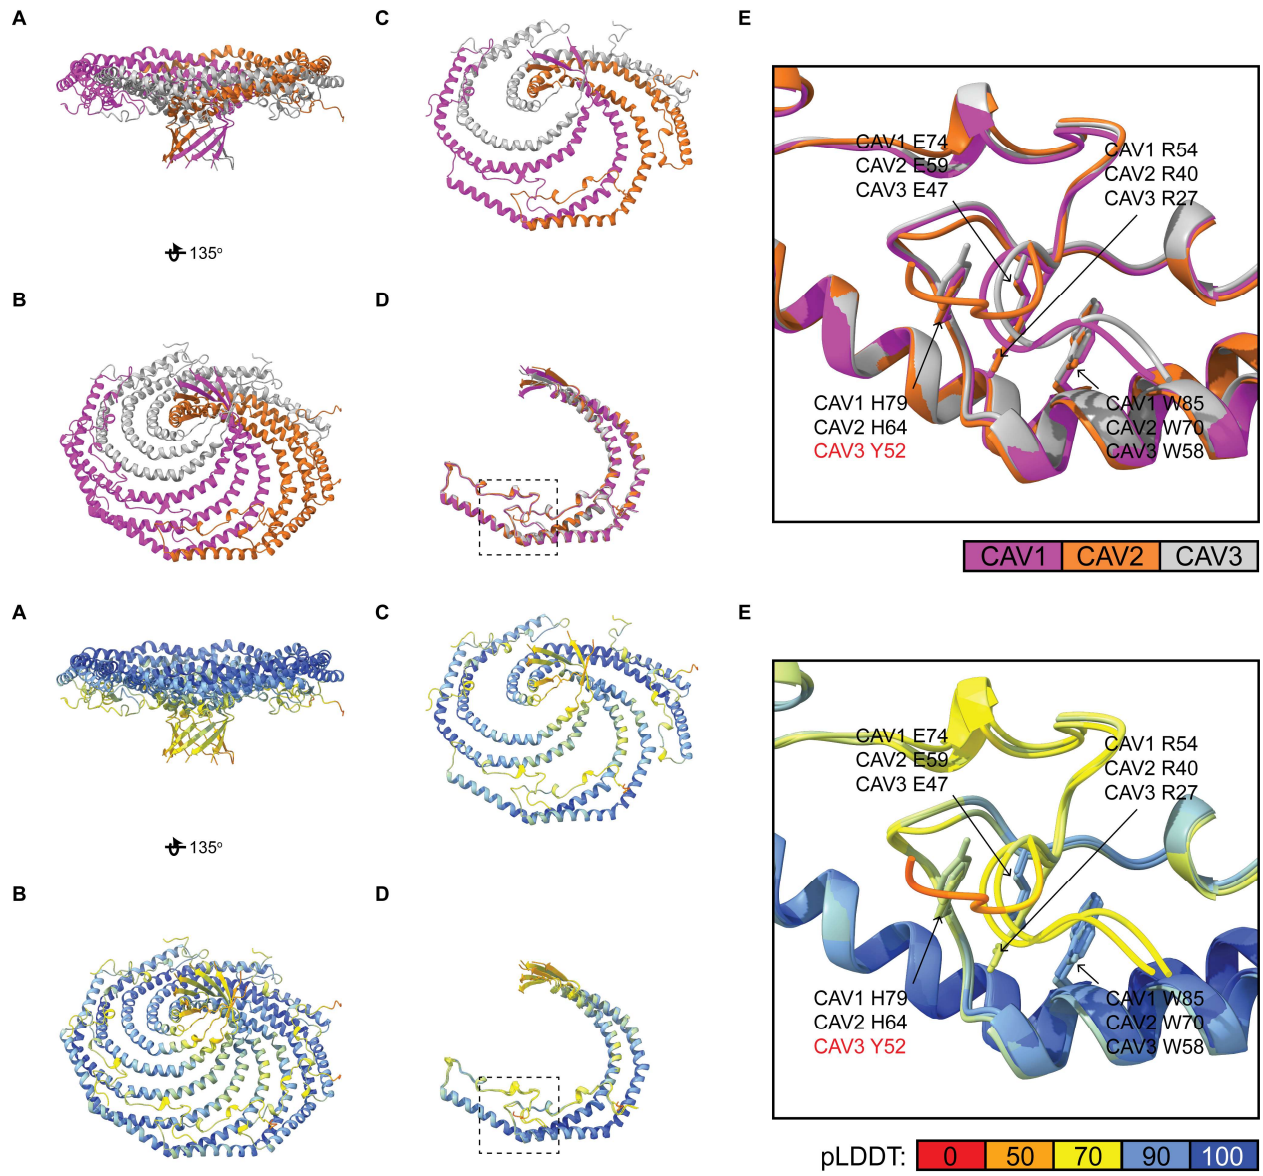



# File S1. Prediction results of the structures of caveolins monomer or oligomers by AlphaFold2.1 with different protomer numbers.

## Note:

The 2D example color sketches were generated from the 3D model by AlphaFold2\_advanced notebook.

The left panel of the monomers were colored by N → C; the left panel of the oligomers were colored by chain; the right panels were colored by pLDDT values as below color key indicated:

pLDDT:  Very low(<50)  Low (60)  OK(70)  Confident (80)  Very high (>90)

Five models were generated for each prediction. The 2D sketches were based on rank 1 models (R1) in this supplemental file if there is no special note was left under the pLDDT value.

# Salpingoeca rosetta

## F2U793

*pLDDT*

1-mer

73.91

colored by N-C

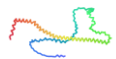

colored by pLDDT

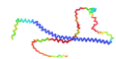

2-mer

59.81

colored by chain

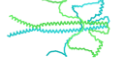

colored by pLDDT

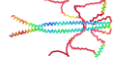

3-mer

47.29

colored by chain

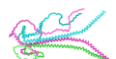

colored by pLDDT

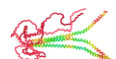

4-mer

57.45

colored by chain

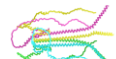

colored by pLDDT

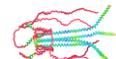

5-mer

42.52

colored by chain

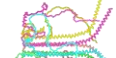

colored by pLDDT

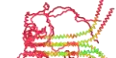

6-mer

42.05

colored by chain

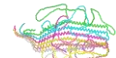

colored by pLDDT

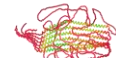

7-mer

45.02

colored by chain

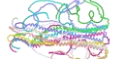

colored by pLDDT

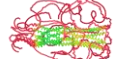

# *Amphimedon queenslandica*

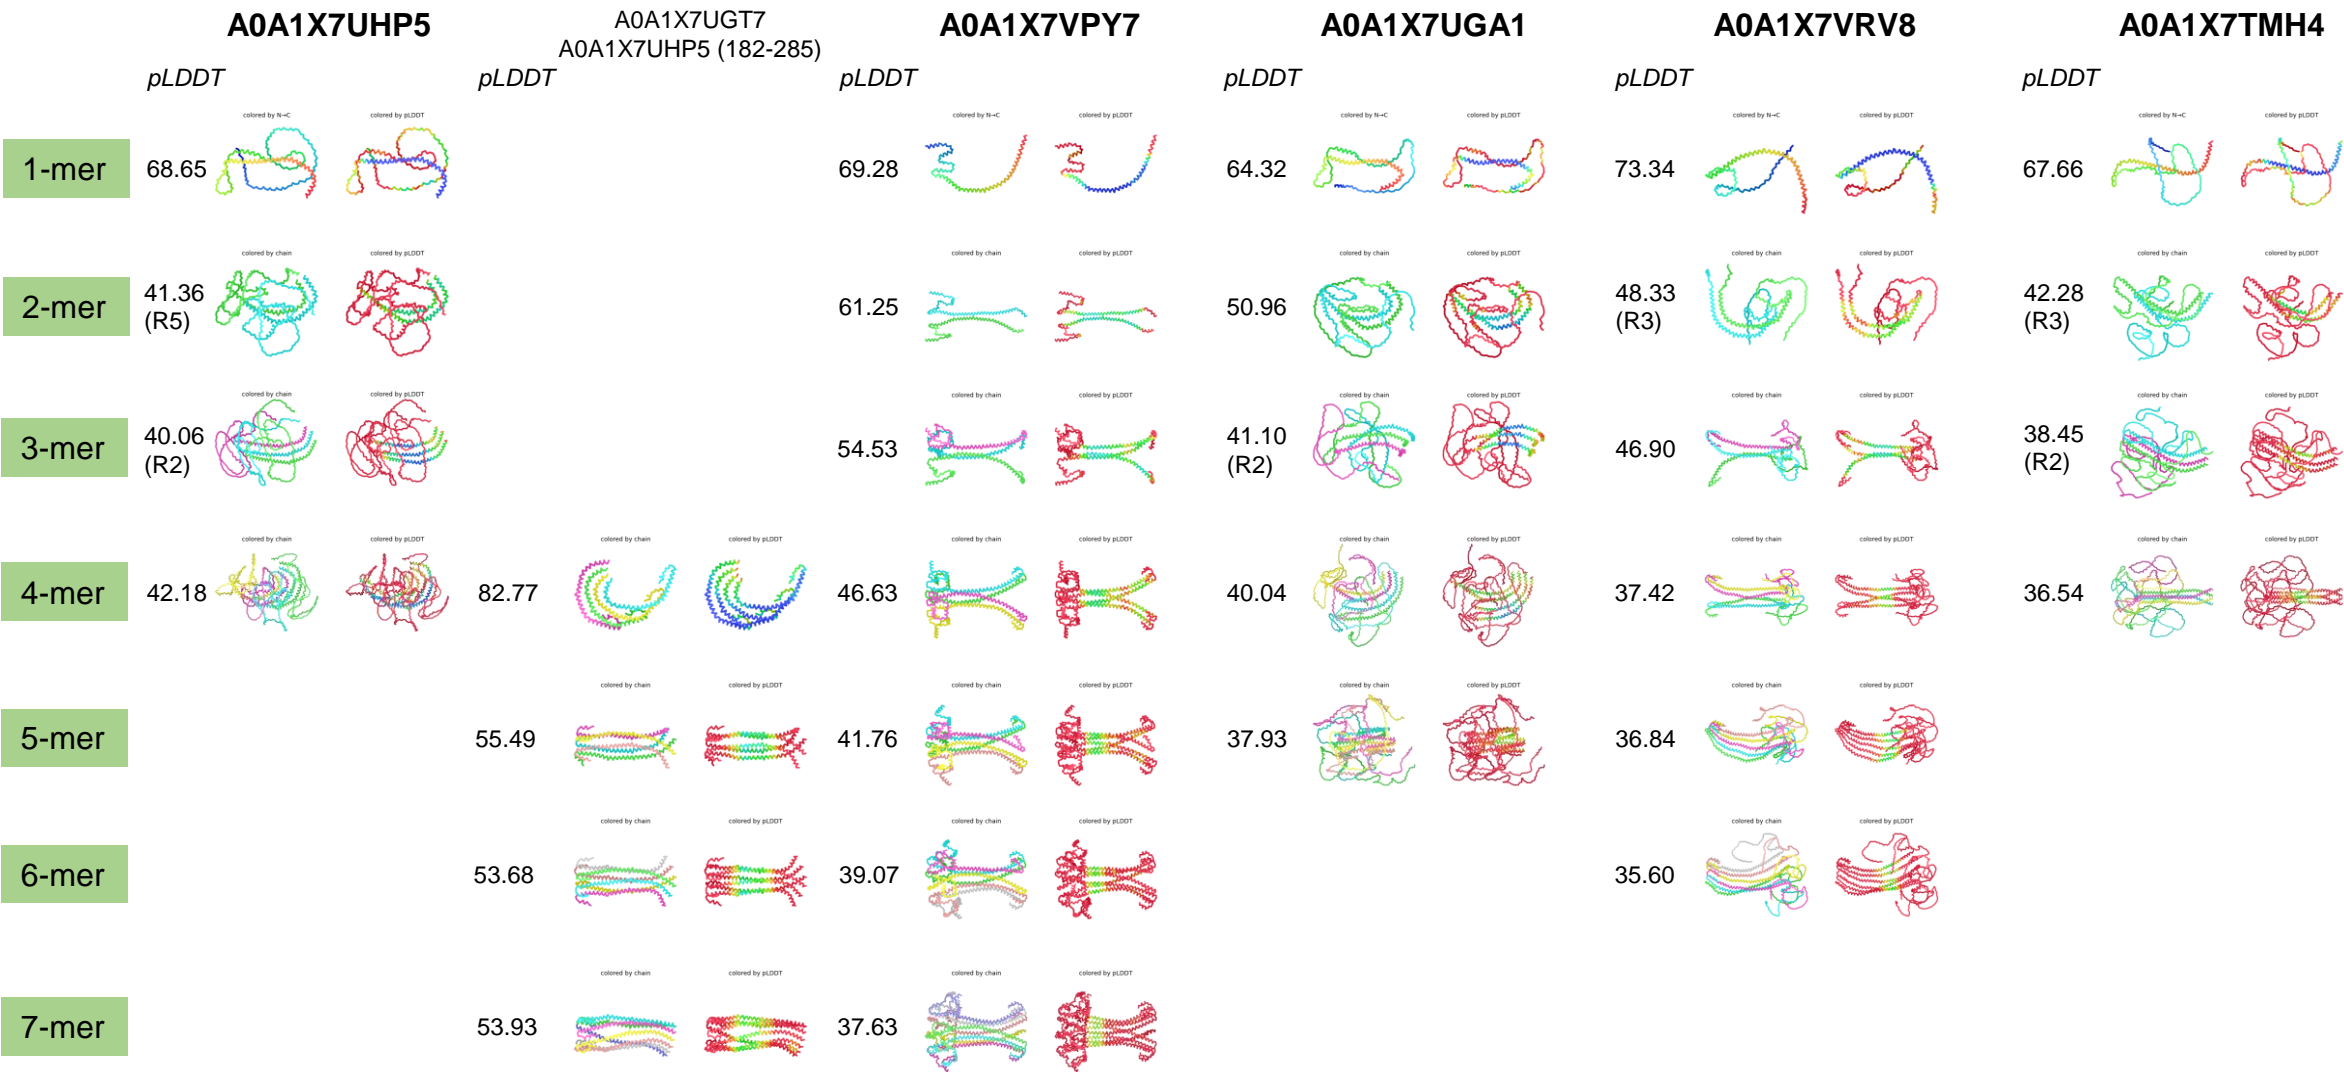

# Oscarella carmela

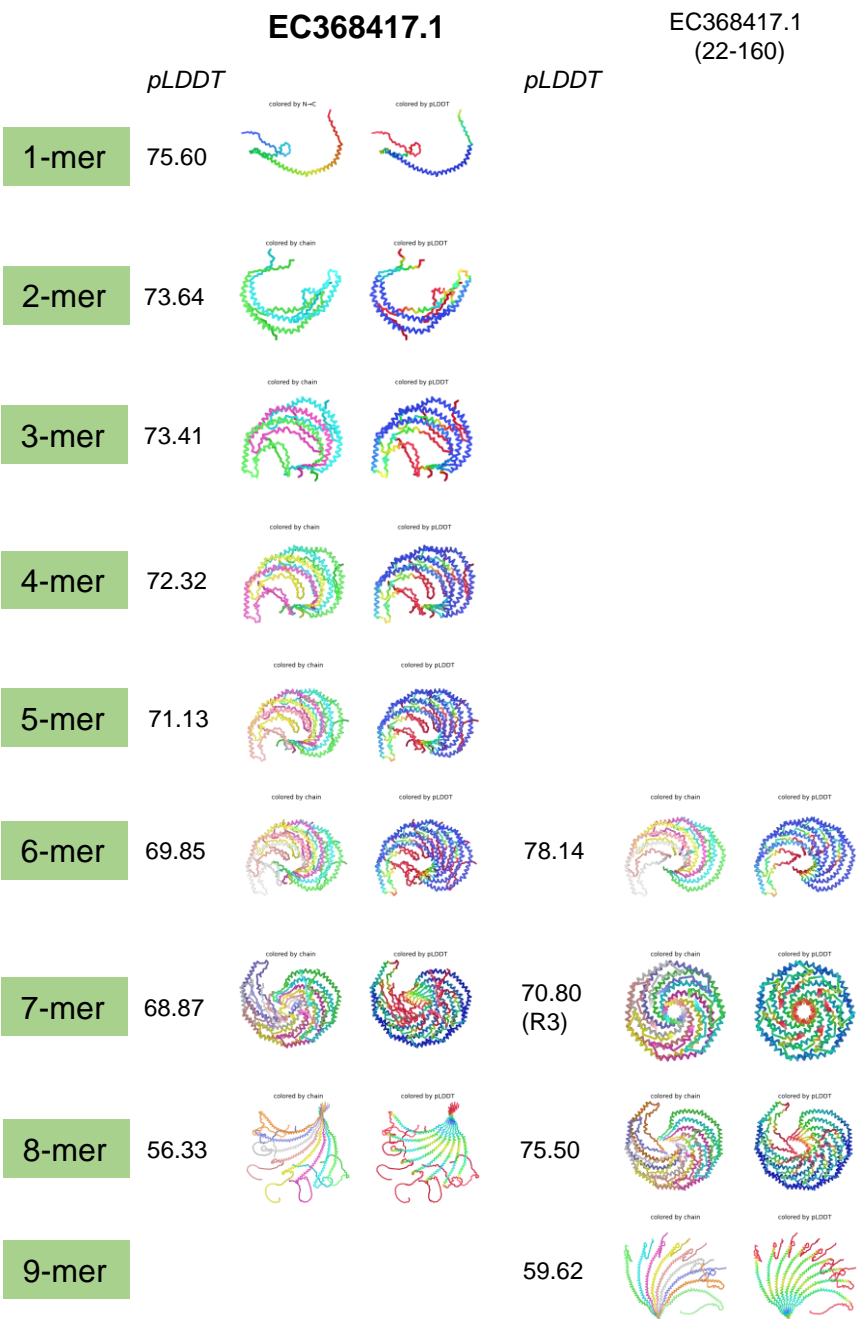



# Trichoplax adhaerens

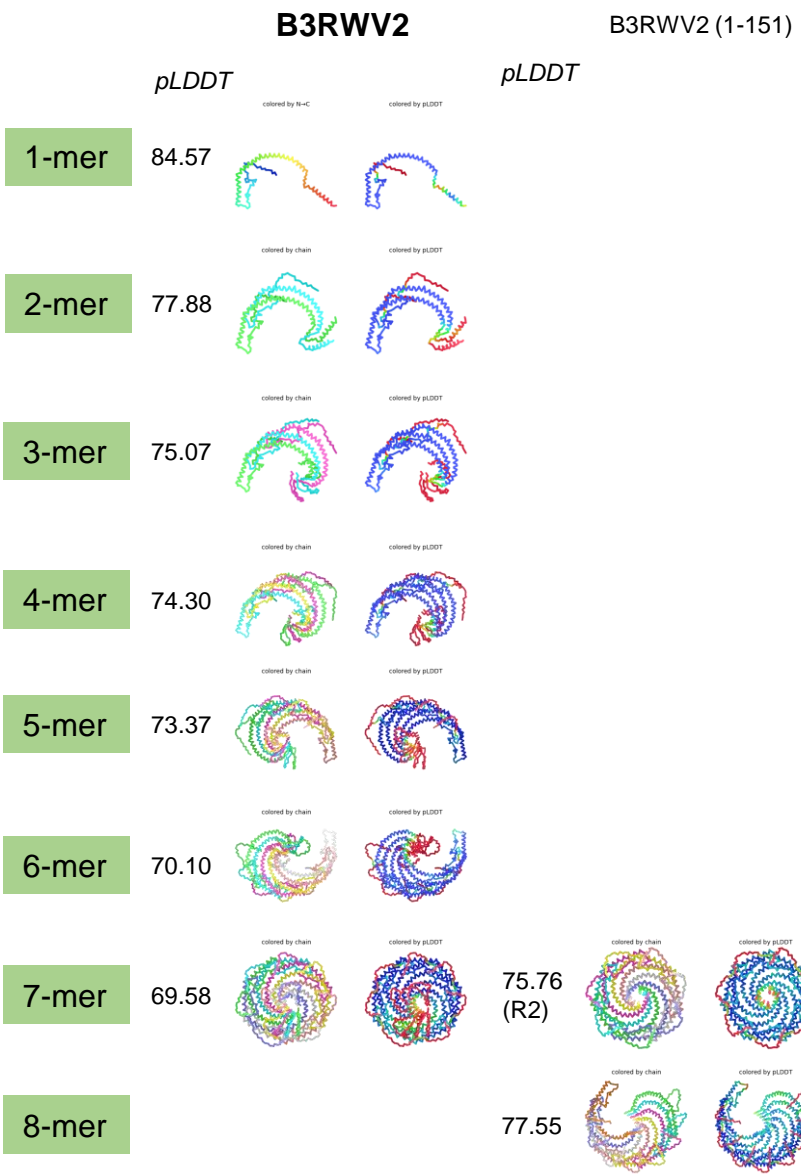

# *Stylophora pistillata*

## A0A2B4SEV1

## A0A2B4SAZ9

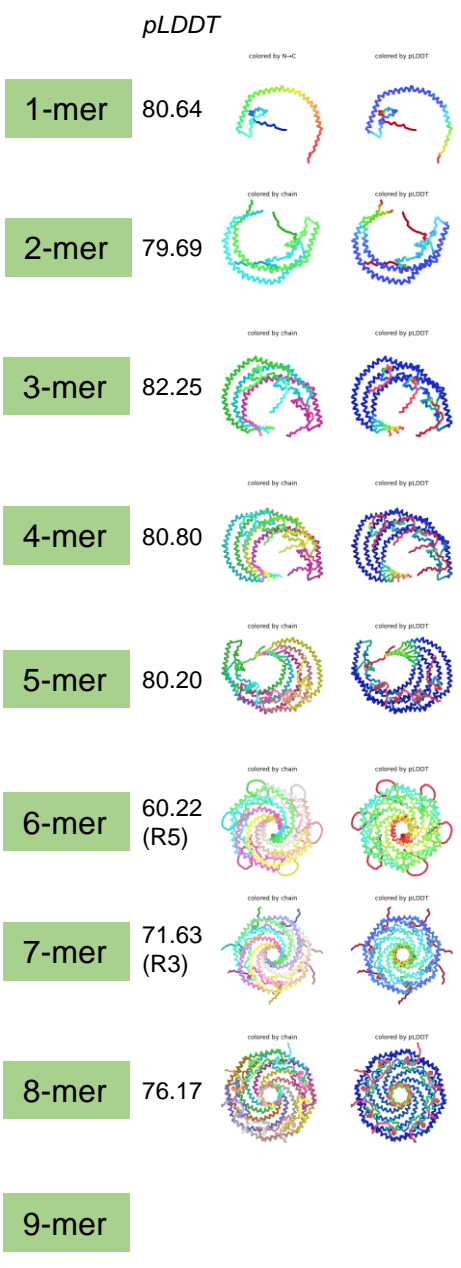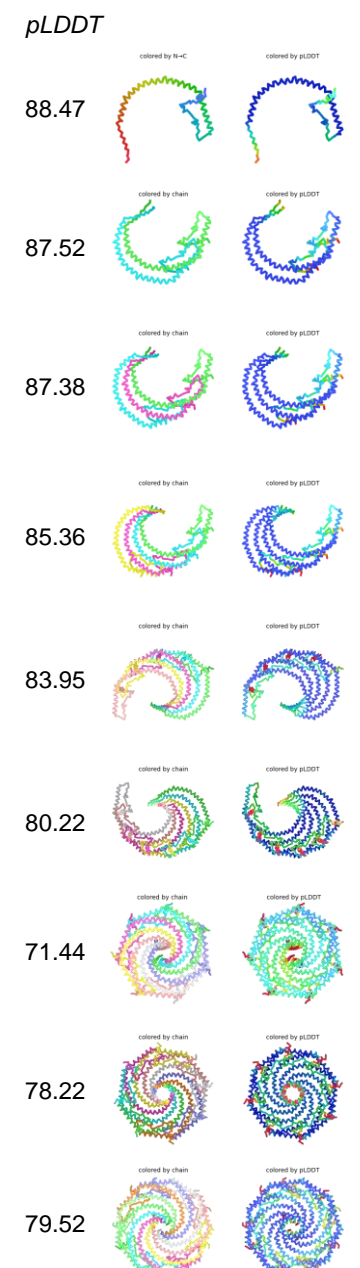

# Homo sapiens

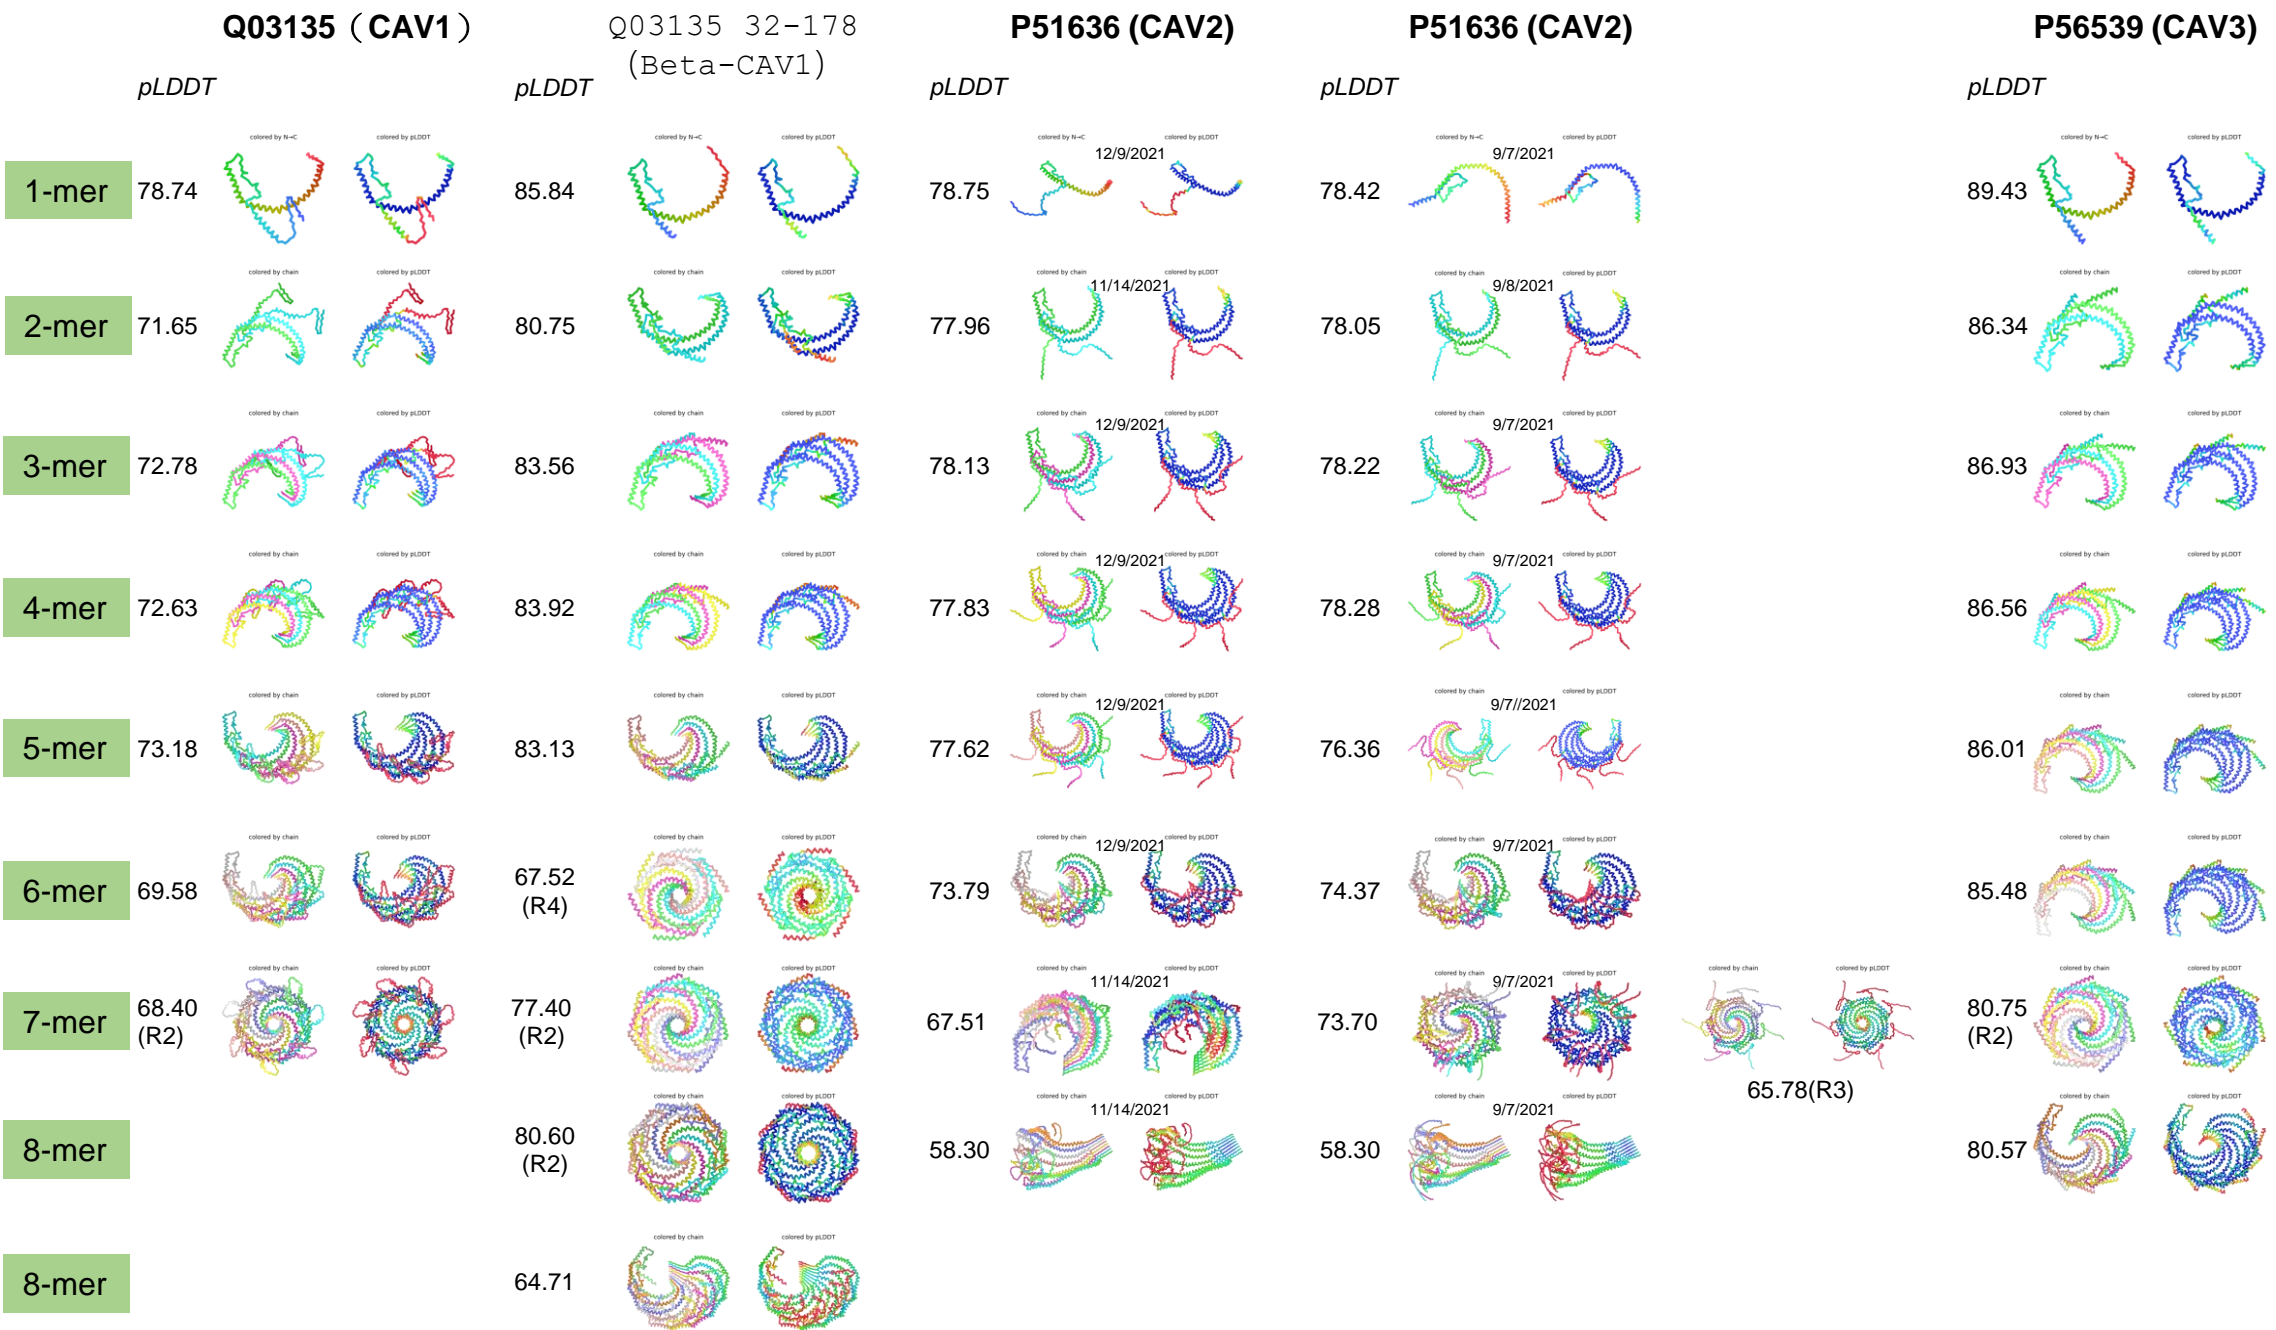

# Strongylocentrotus purpuratus

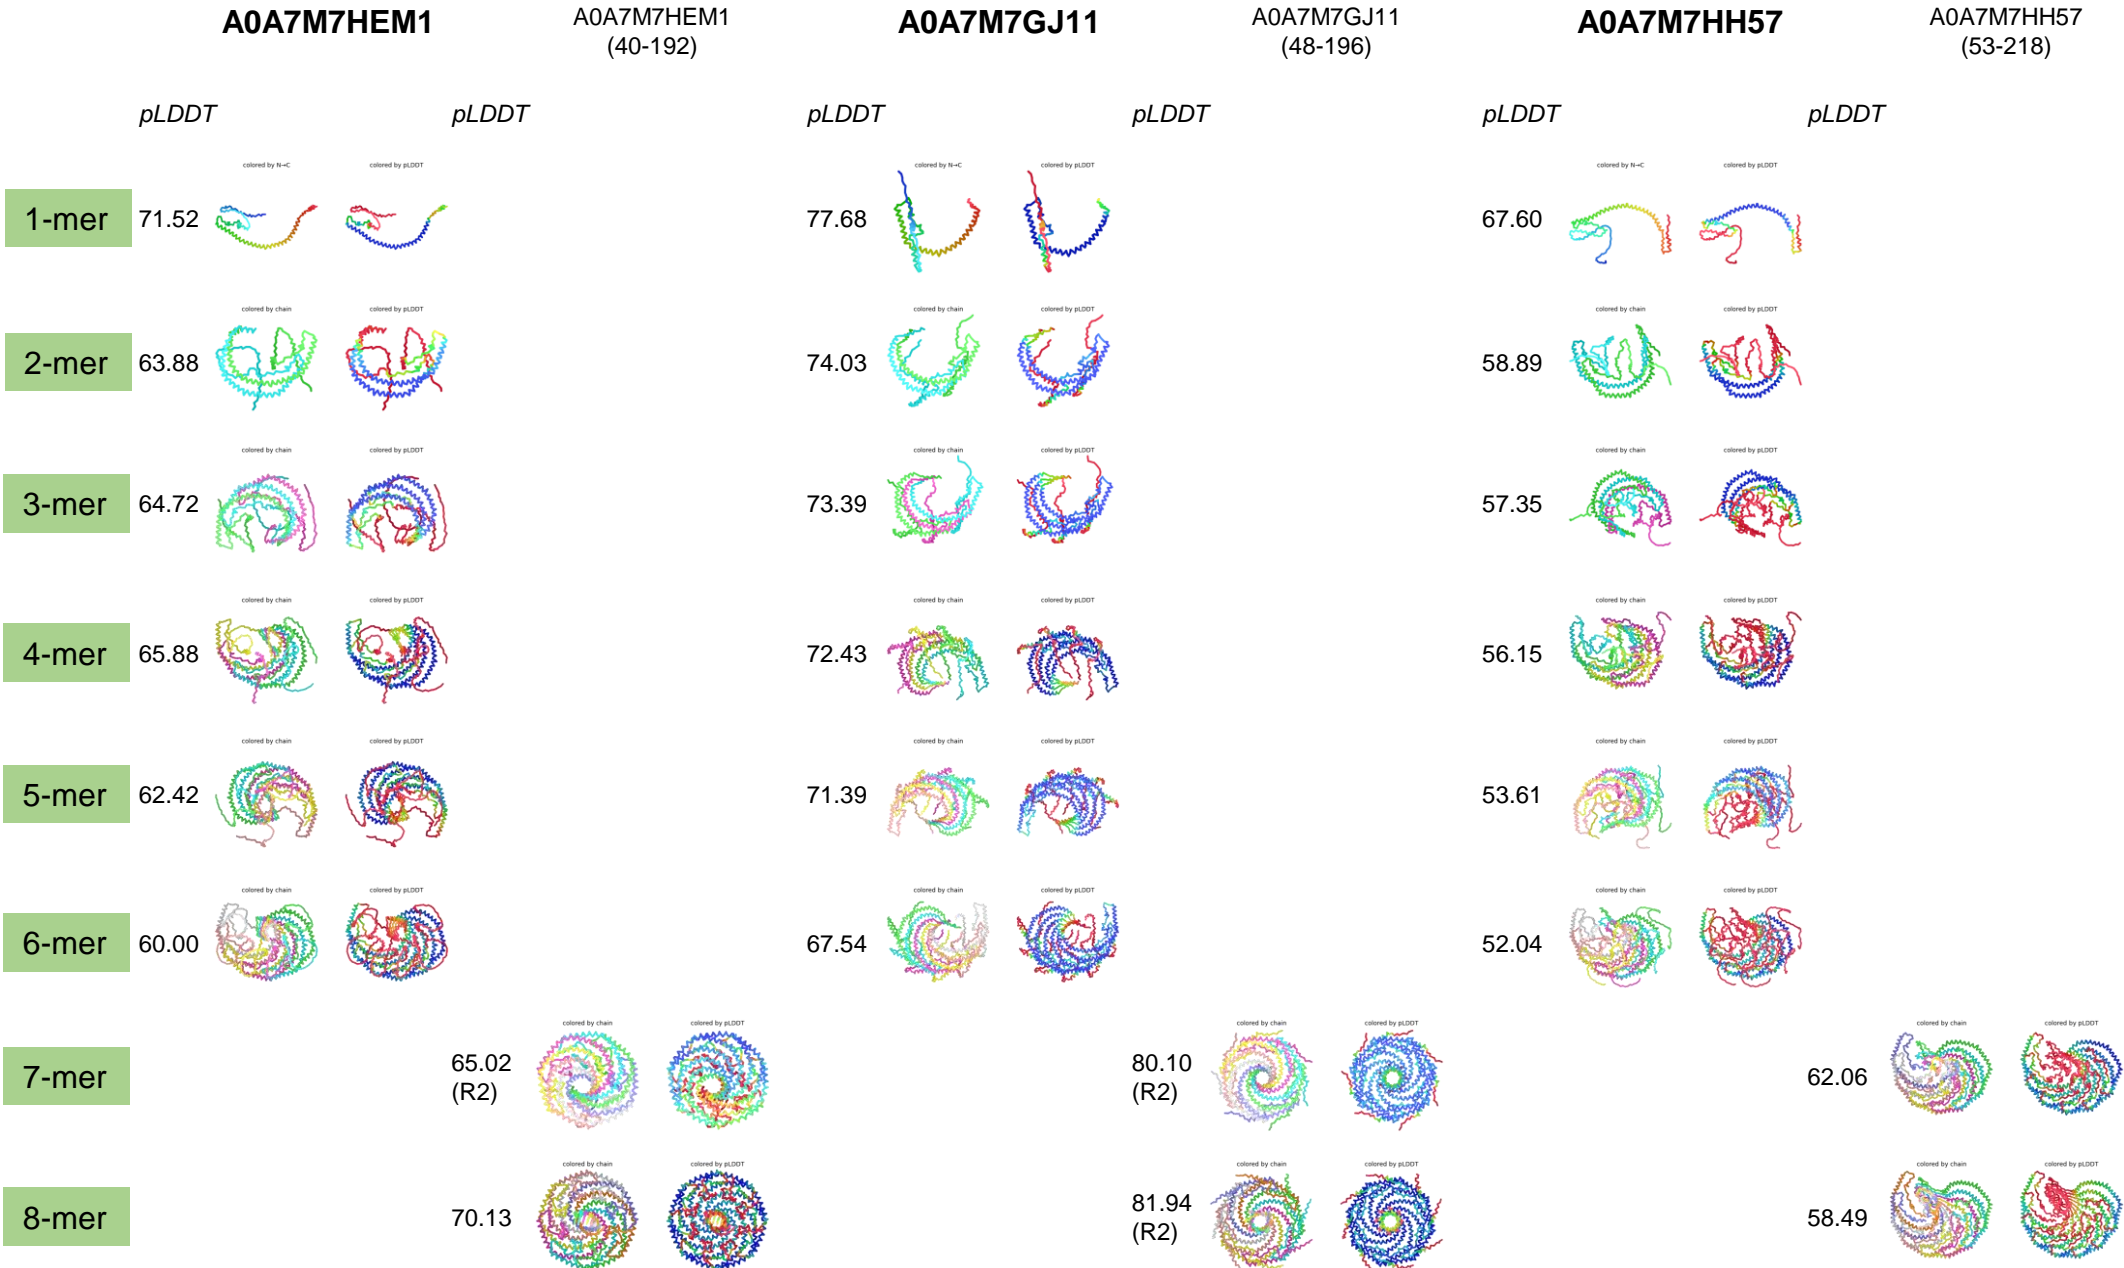

# *Strongylocentrotus purpuratus*

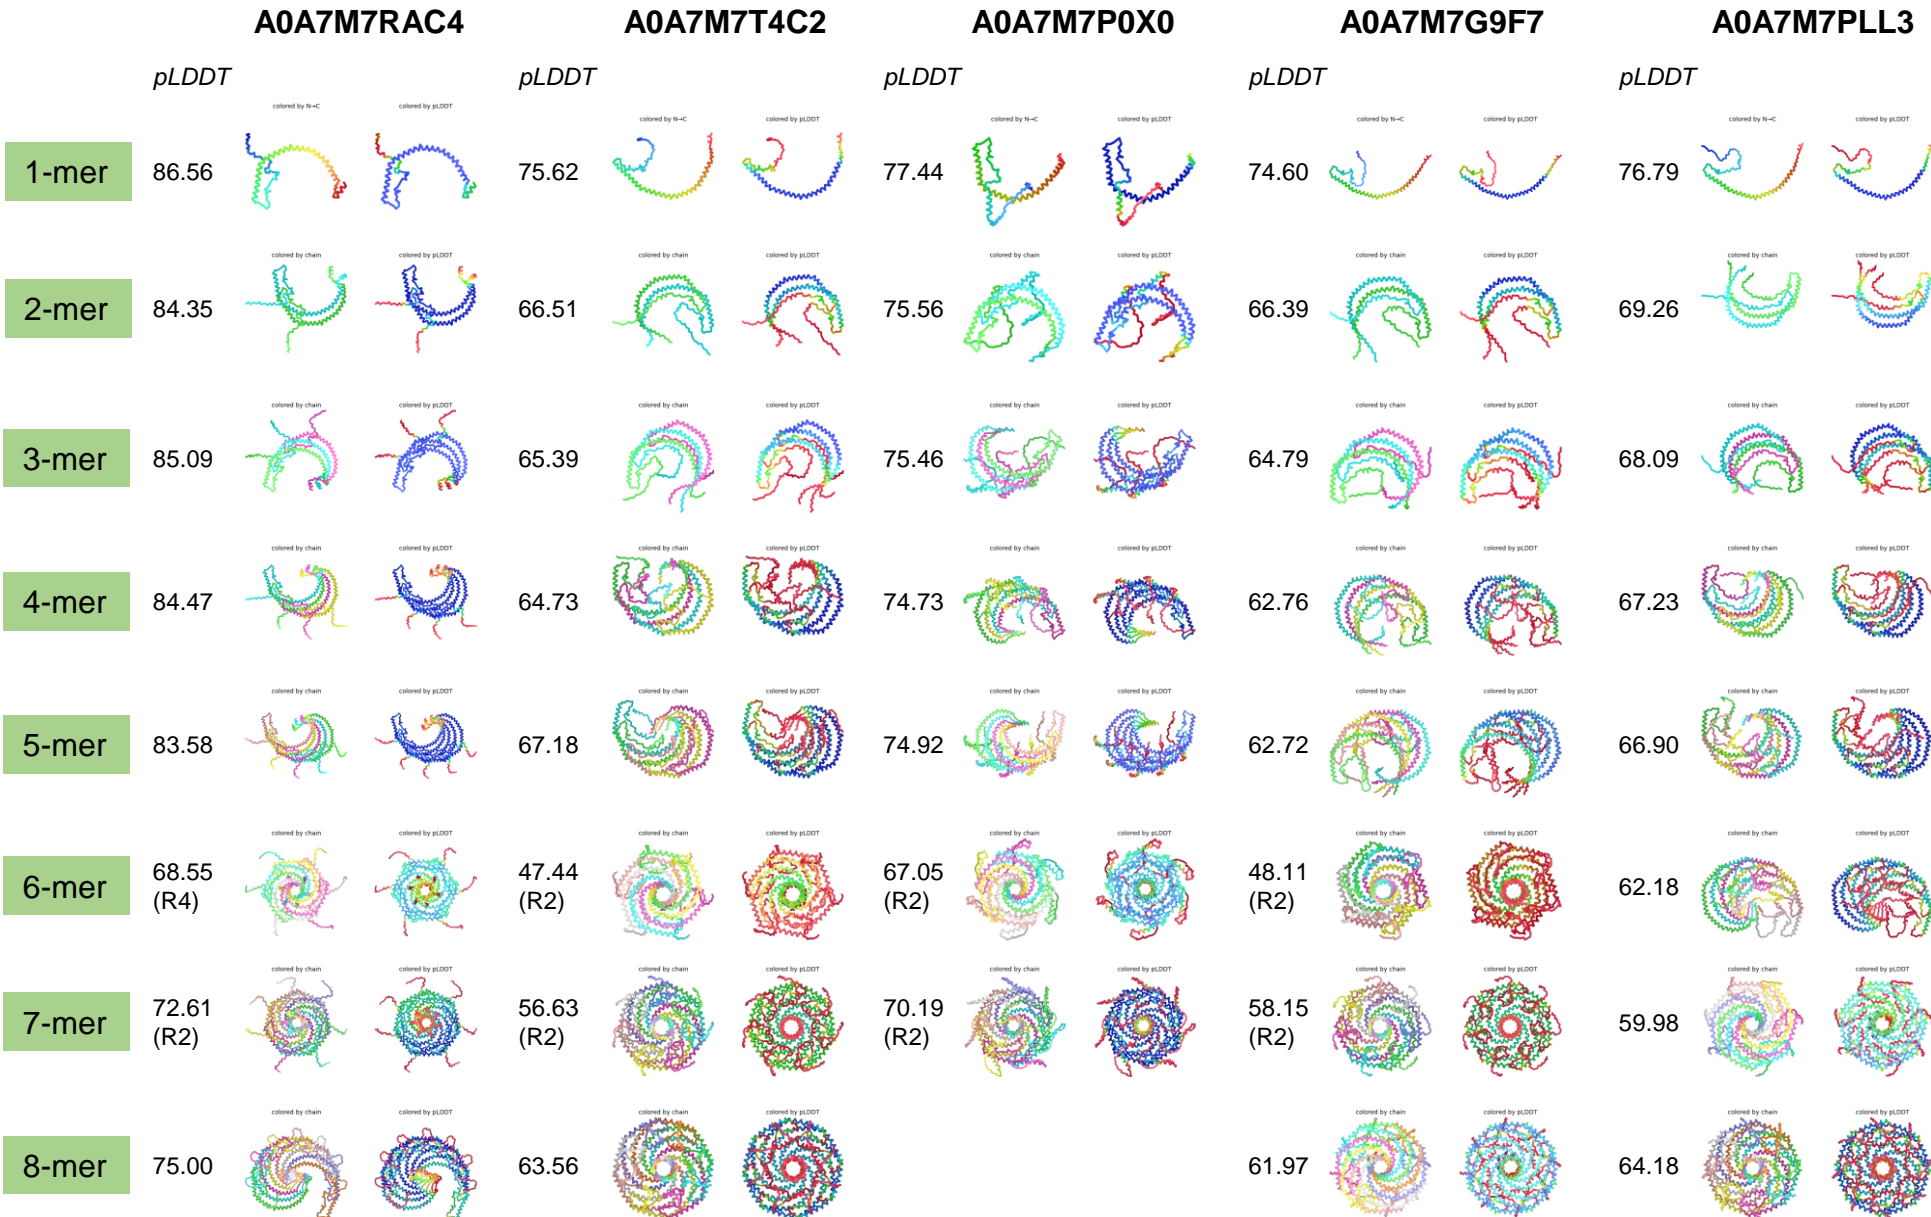

# *Priapulus caudatus*

**XP\_014678552.1**

**XP\_014664738.1**

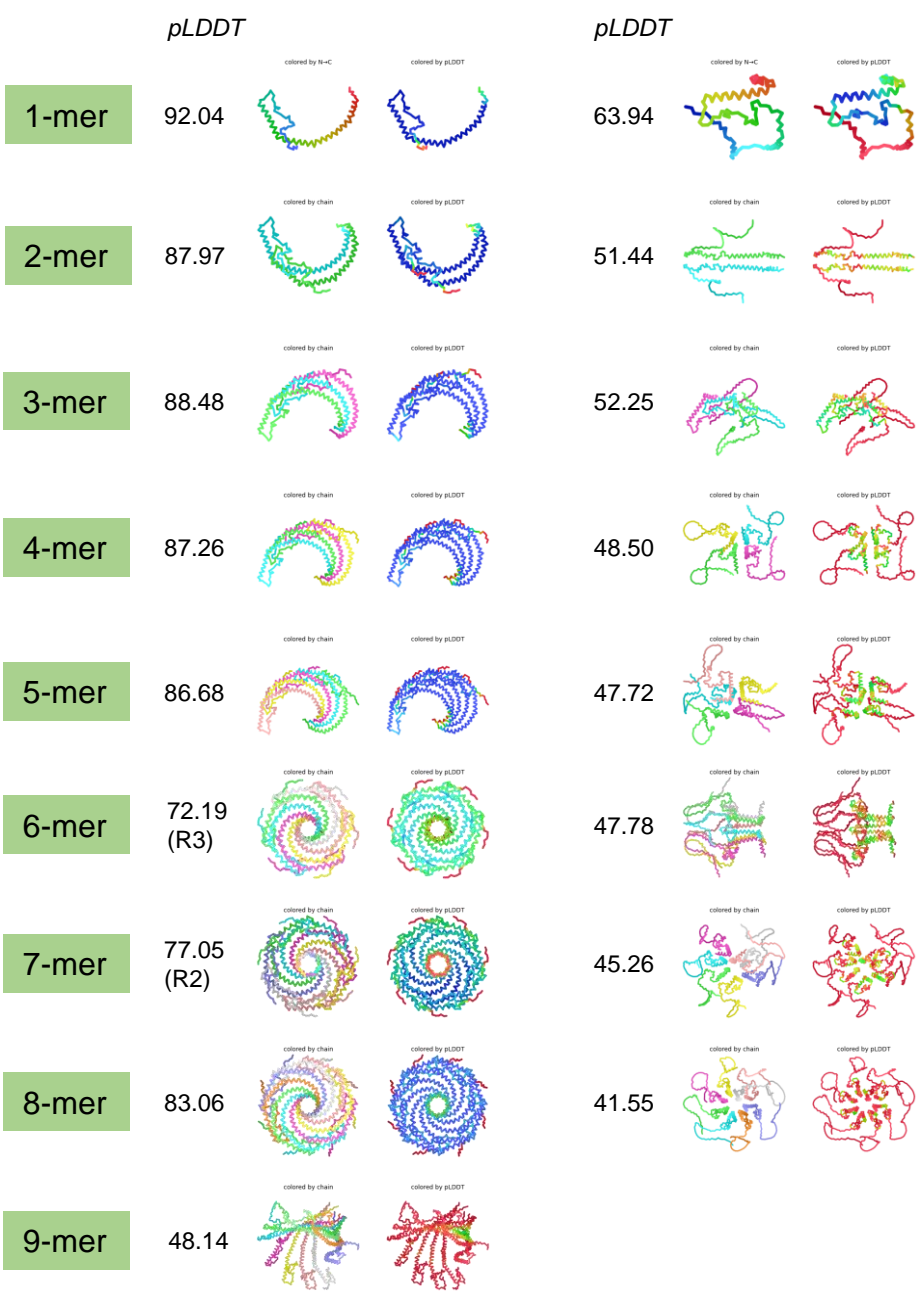

# Apis mellifera

## A0A7M7R2L2

## A0A7M7GWE0 A0A7M7R2L2 (24-177)

*pLDDT*

*pLDDT*

1-mer

80.39

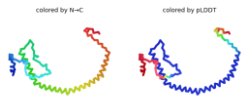

2-mer

72.87

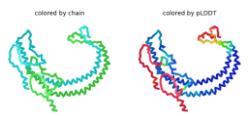

3-mer

74.73

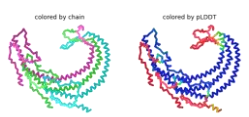

4-mer

74.72

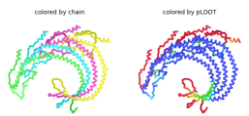

5-mer

74.02

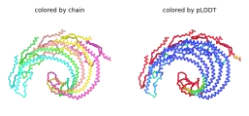

6-mer

73.72

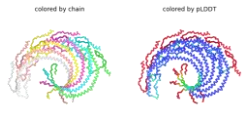

7-mer

65.85

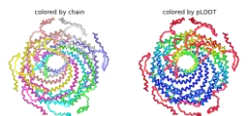

8-mer

70.61  
(R2)

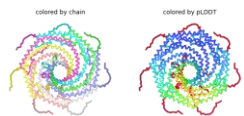

76.08

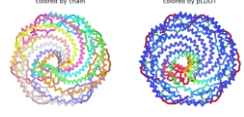

# Caenorhabditis elegans

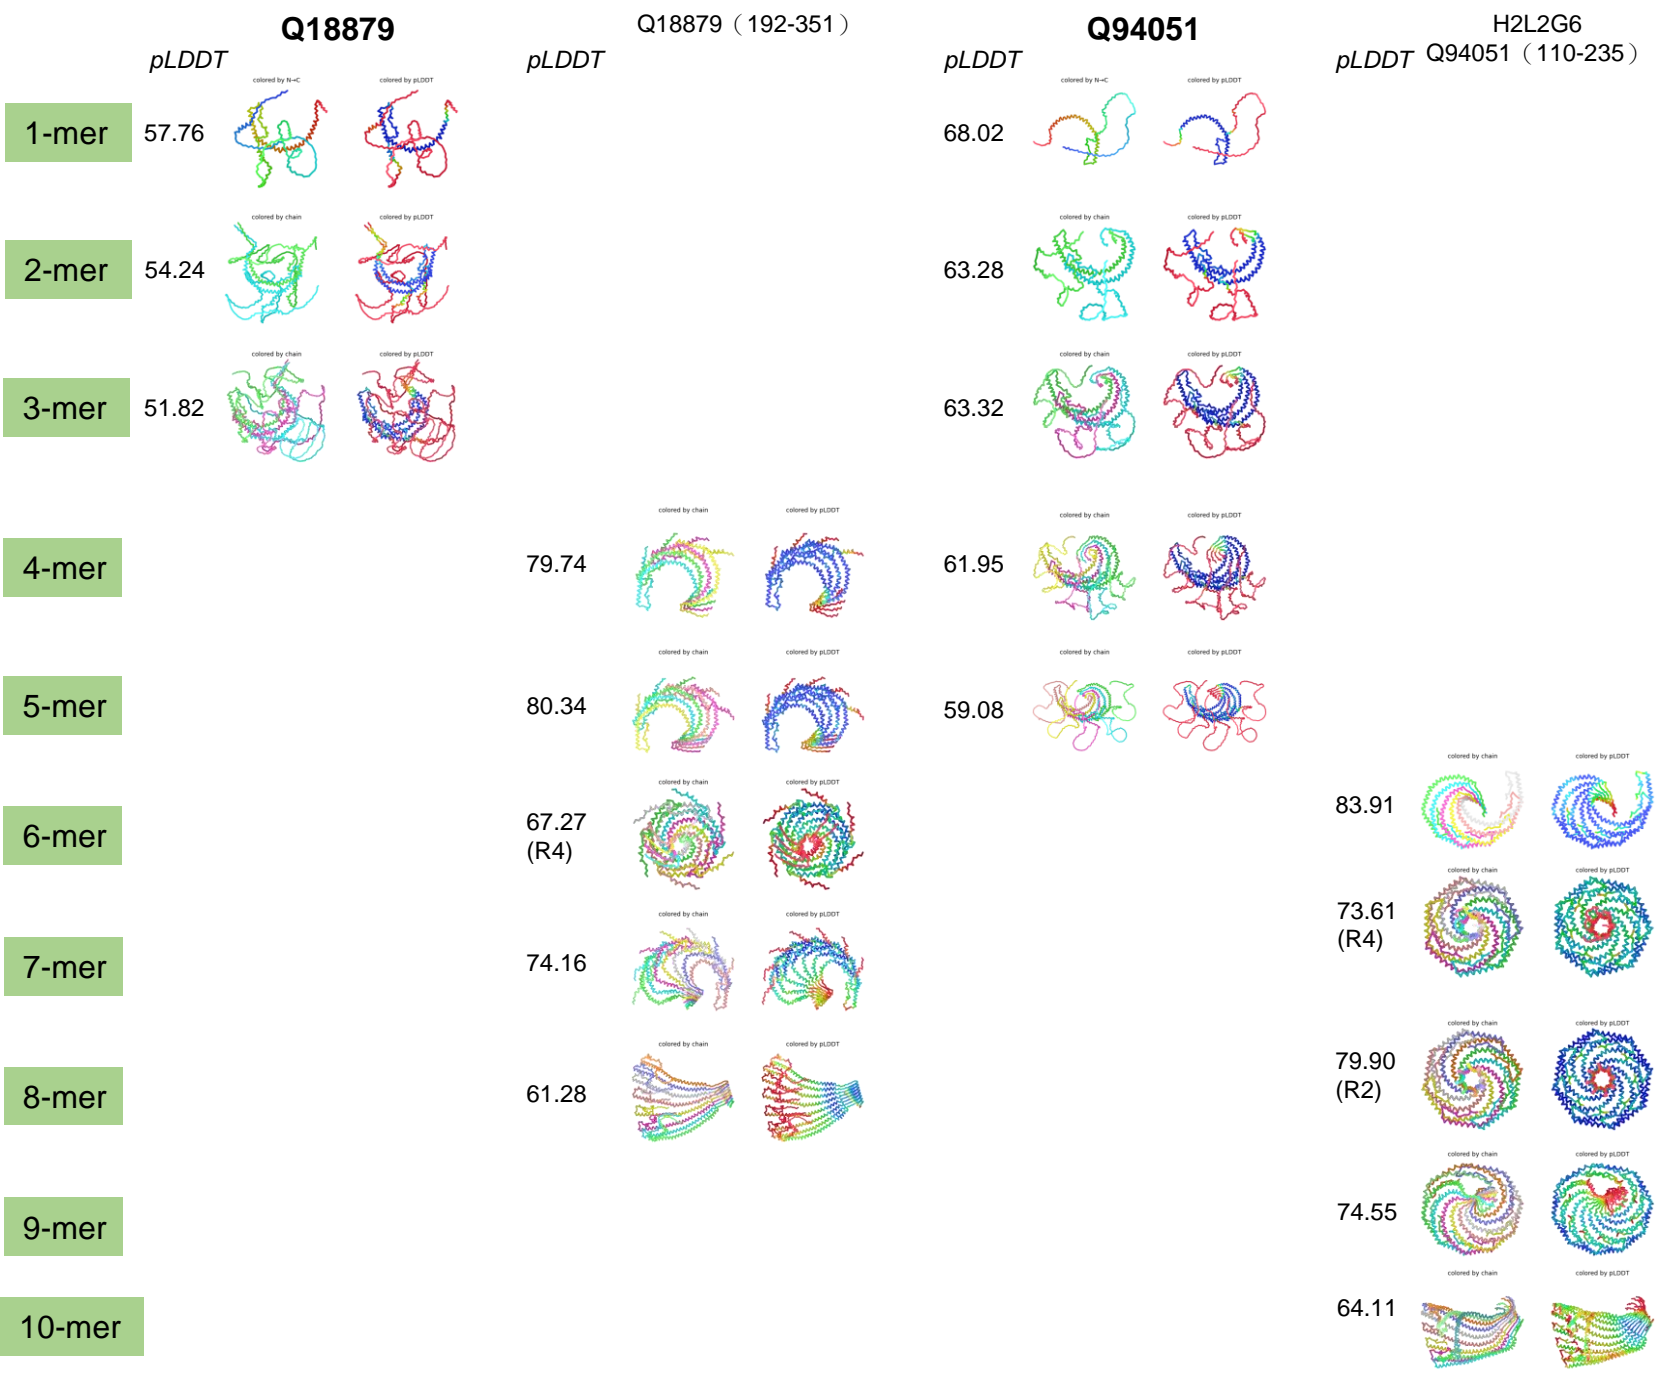



# *Brachionus plicatilis*

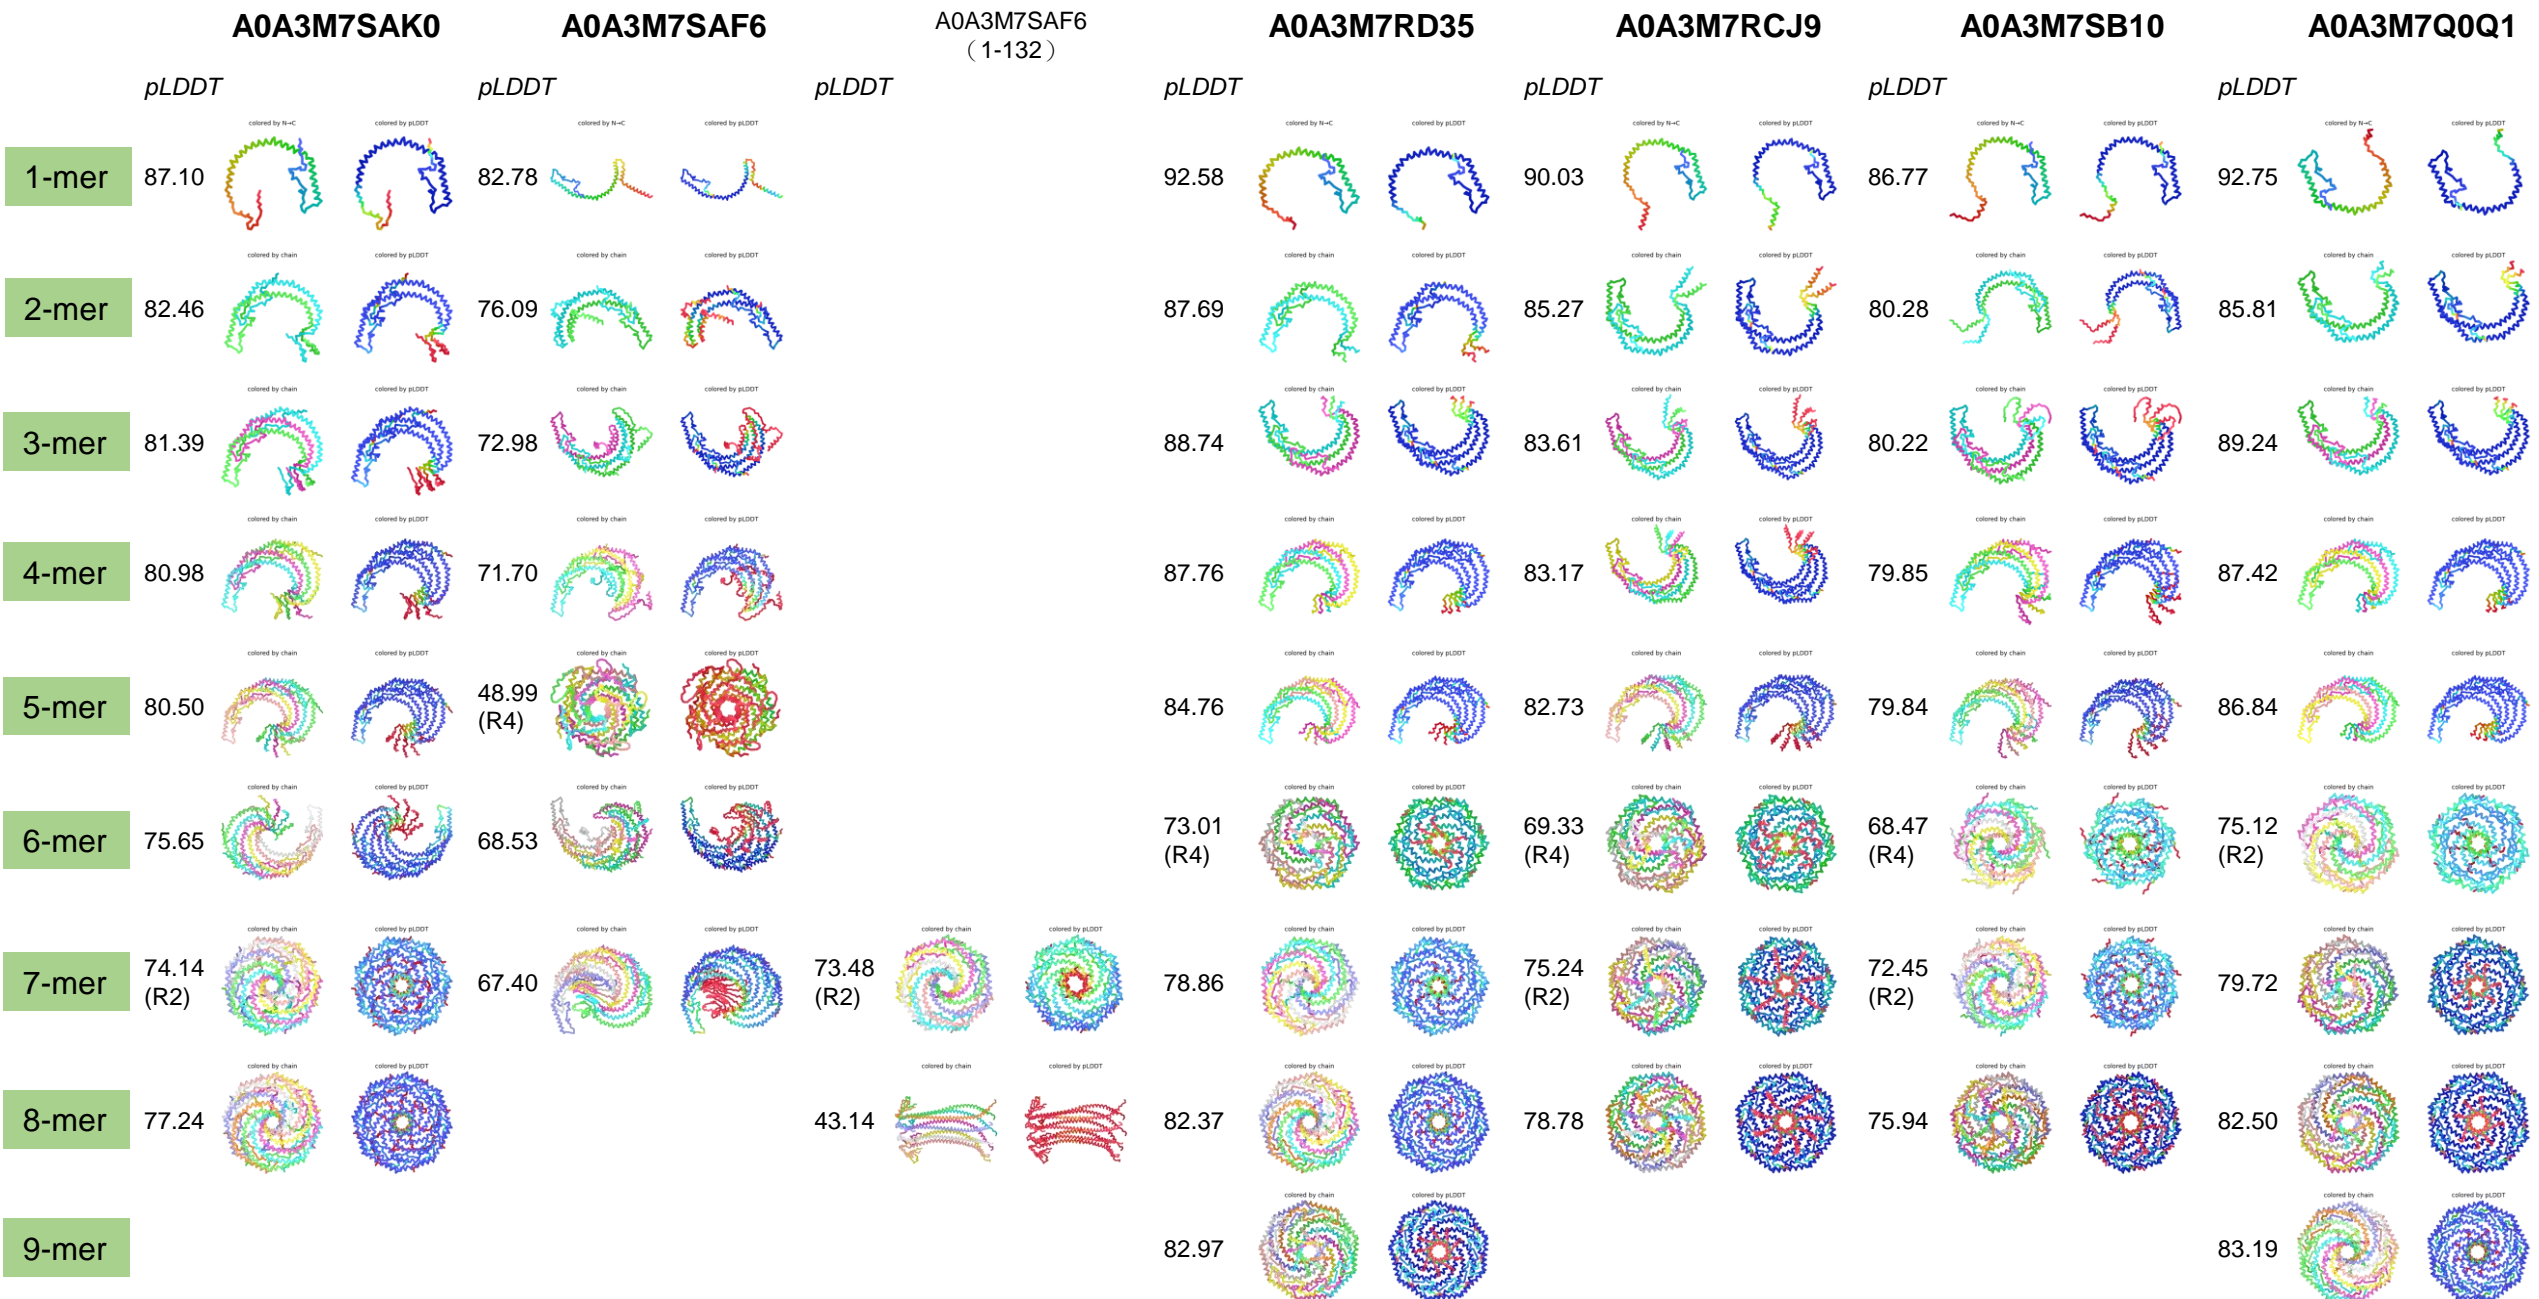

# Macrostromum lignano

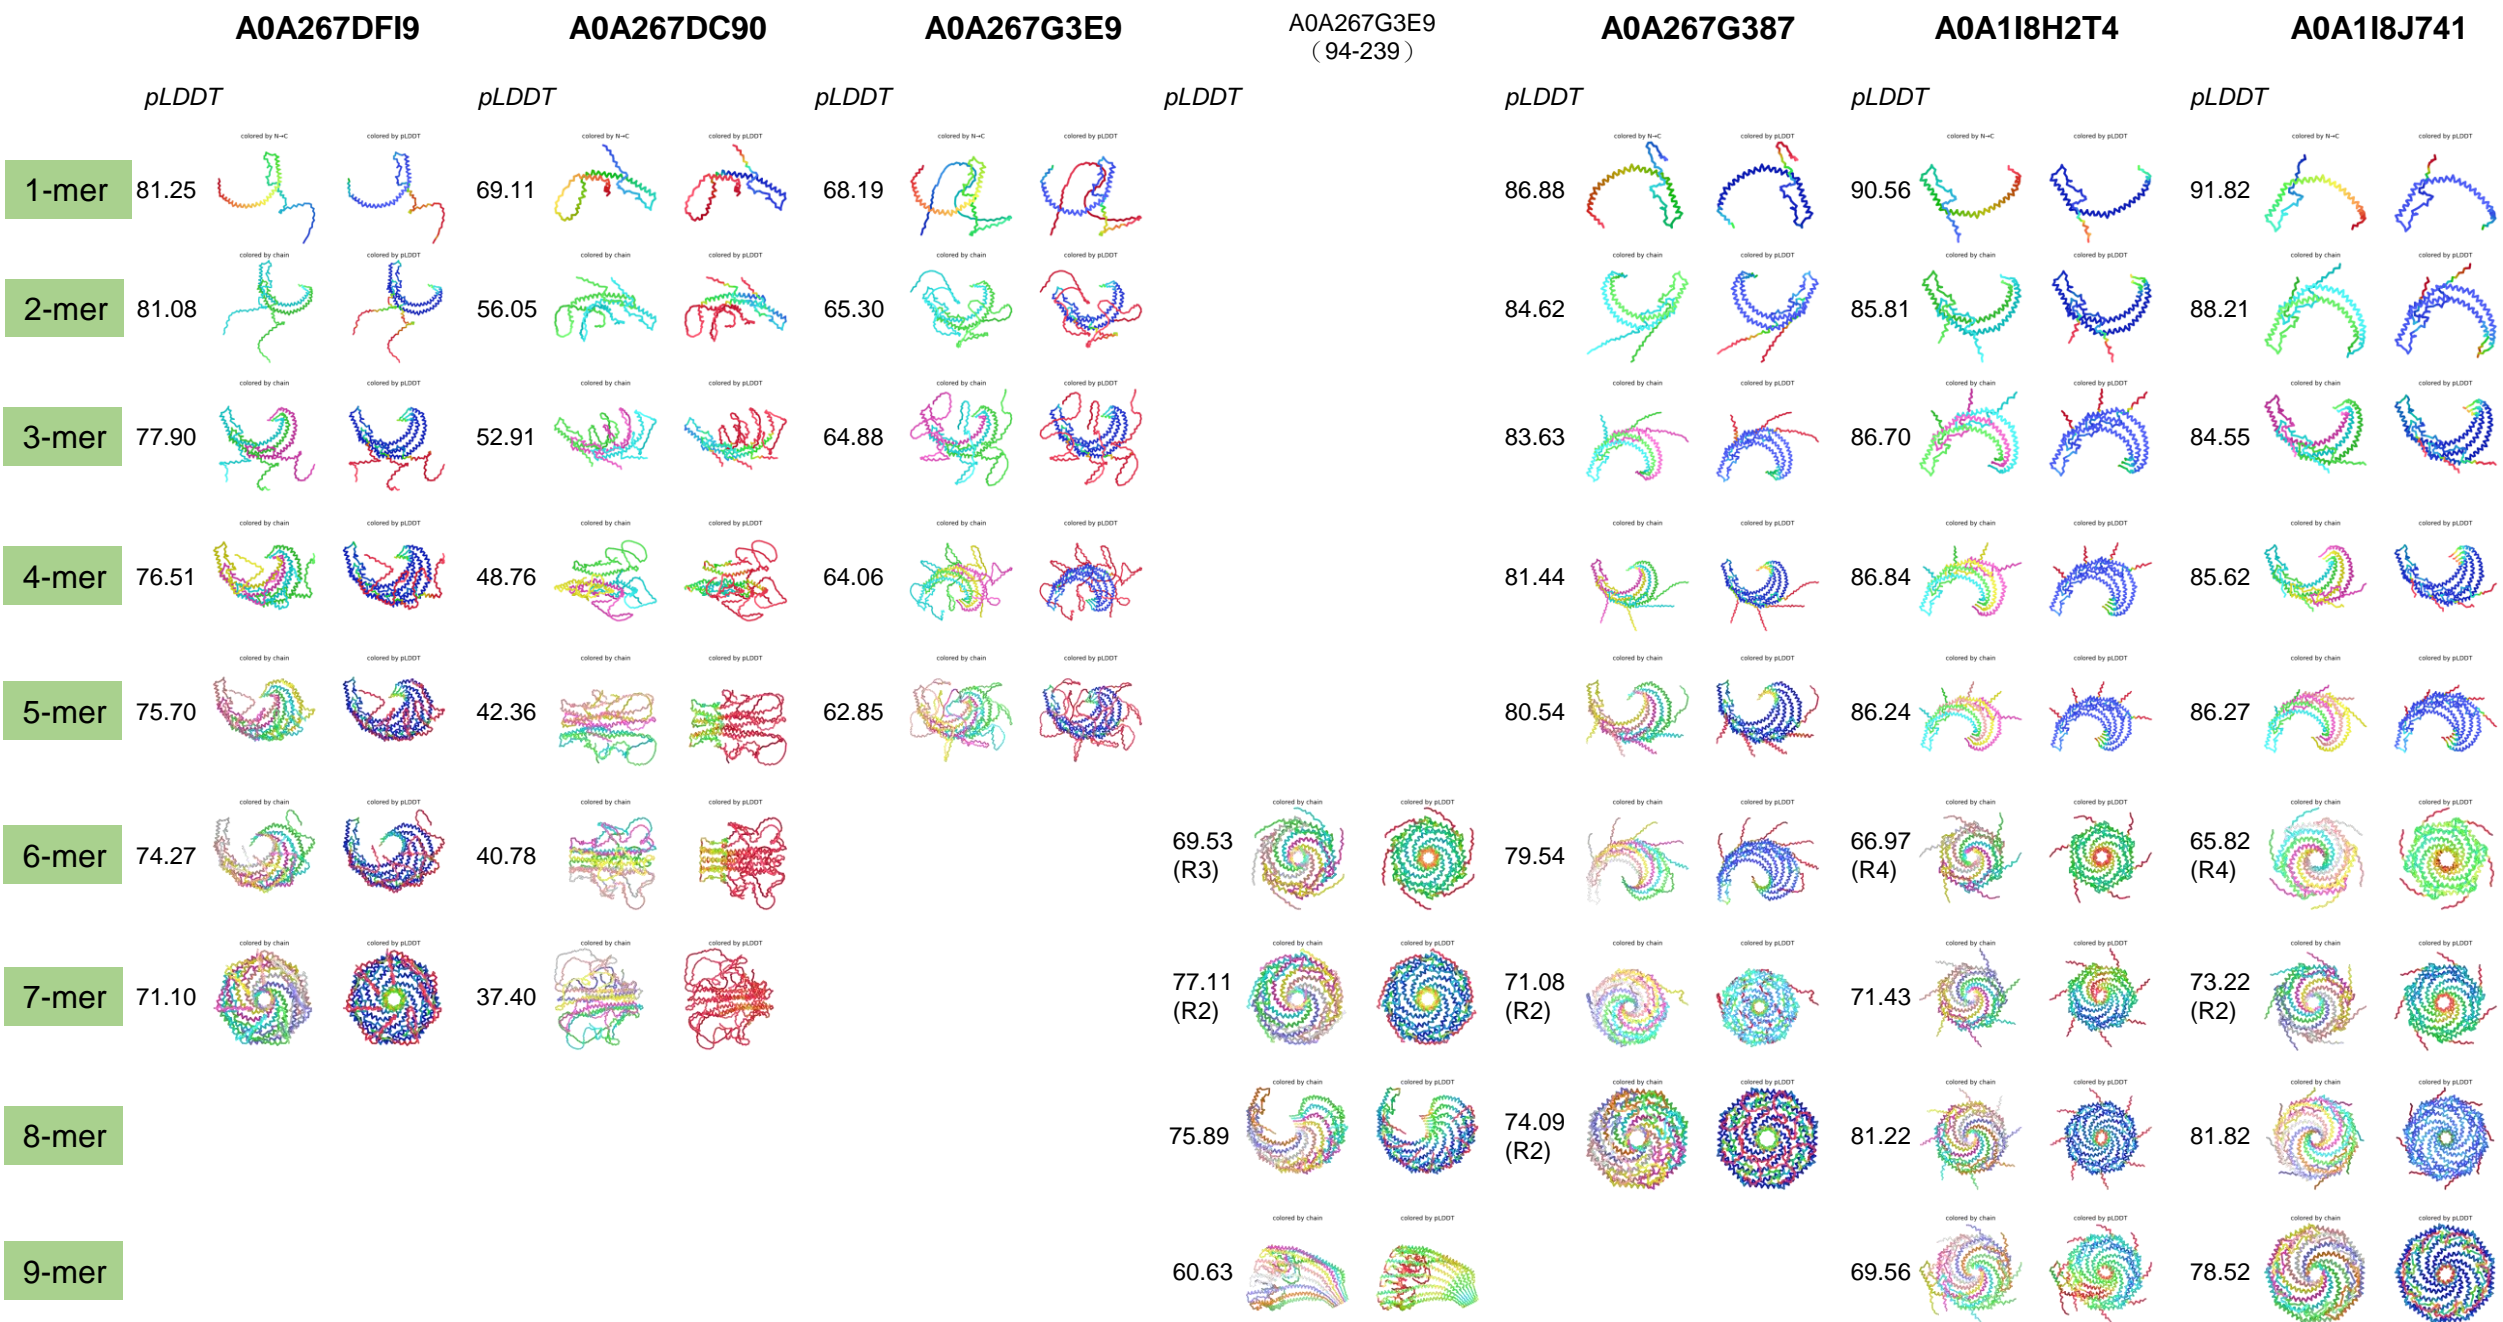

# Macrostromum lignano

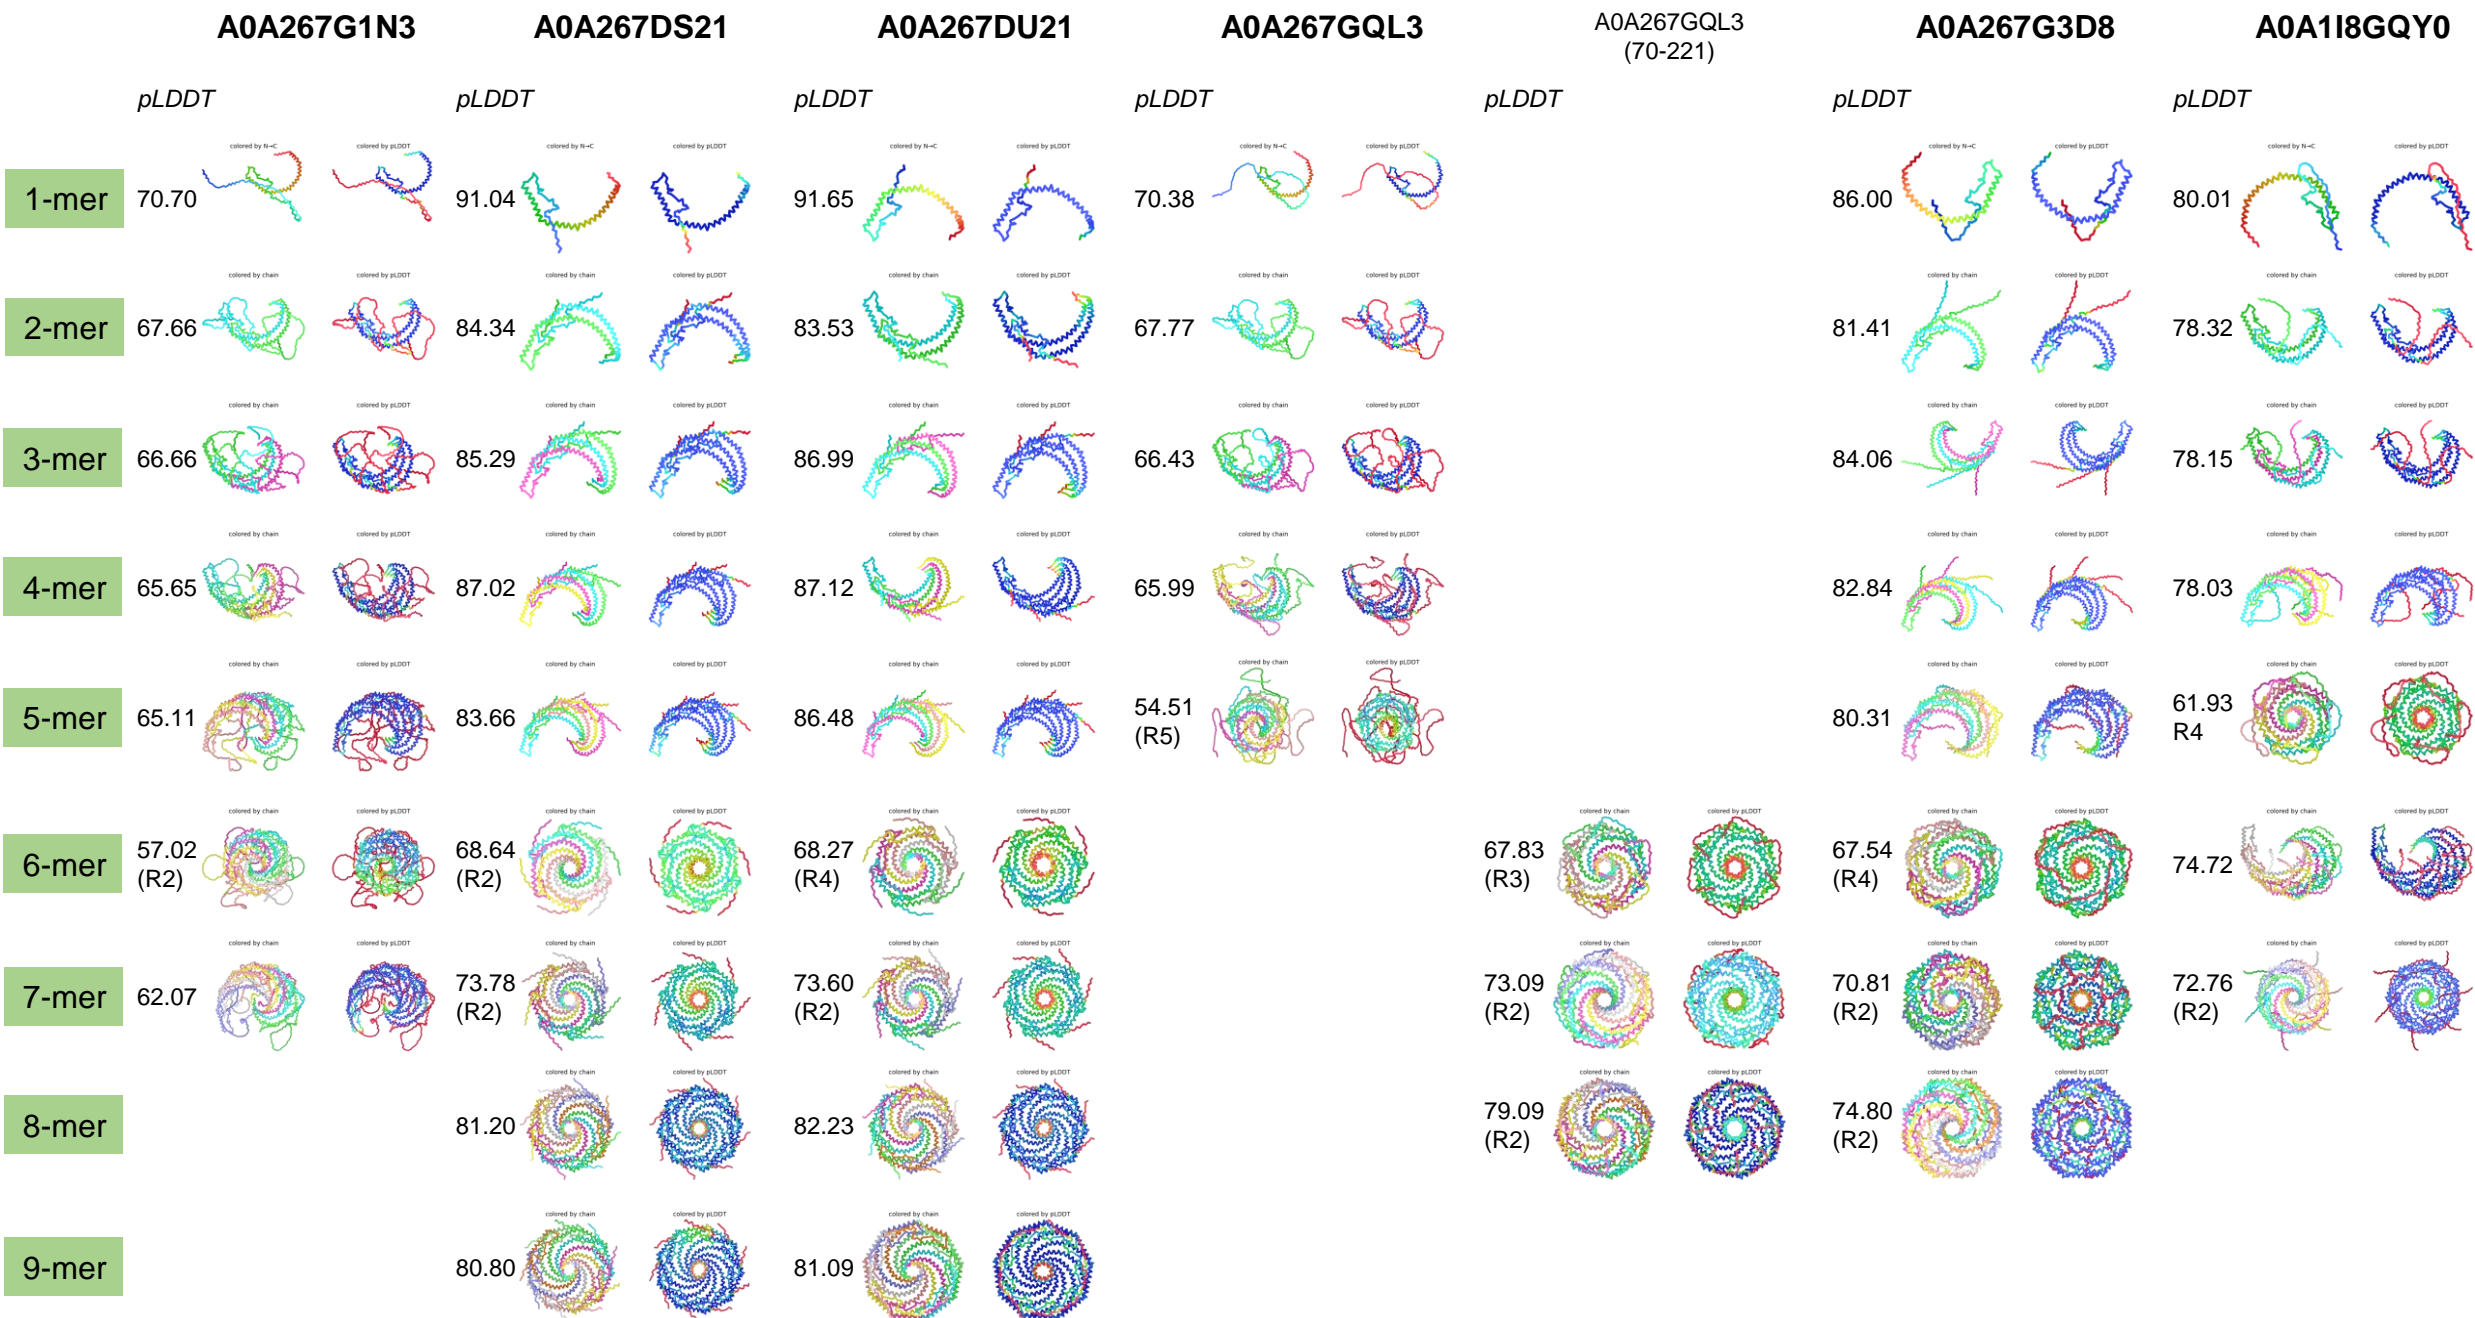

# Macrostomum lignano

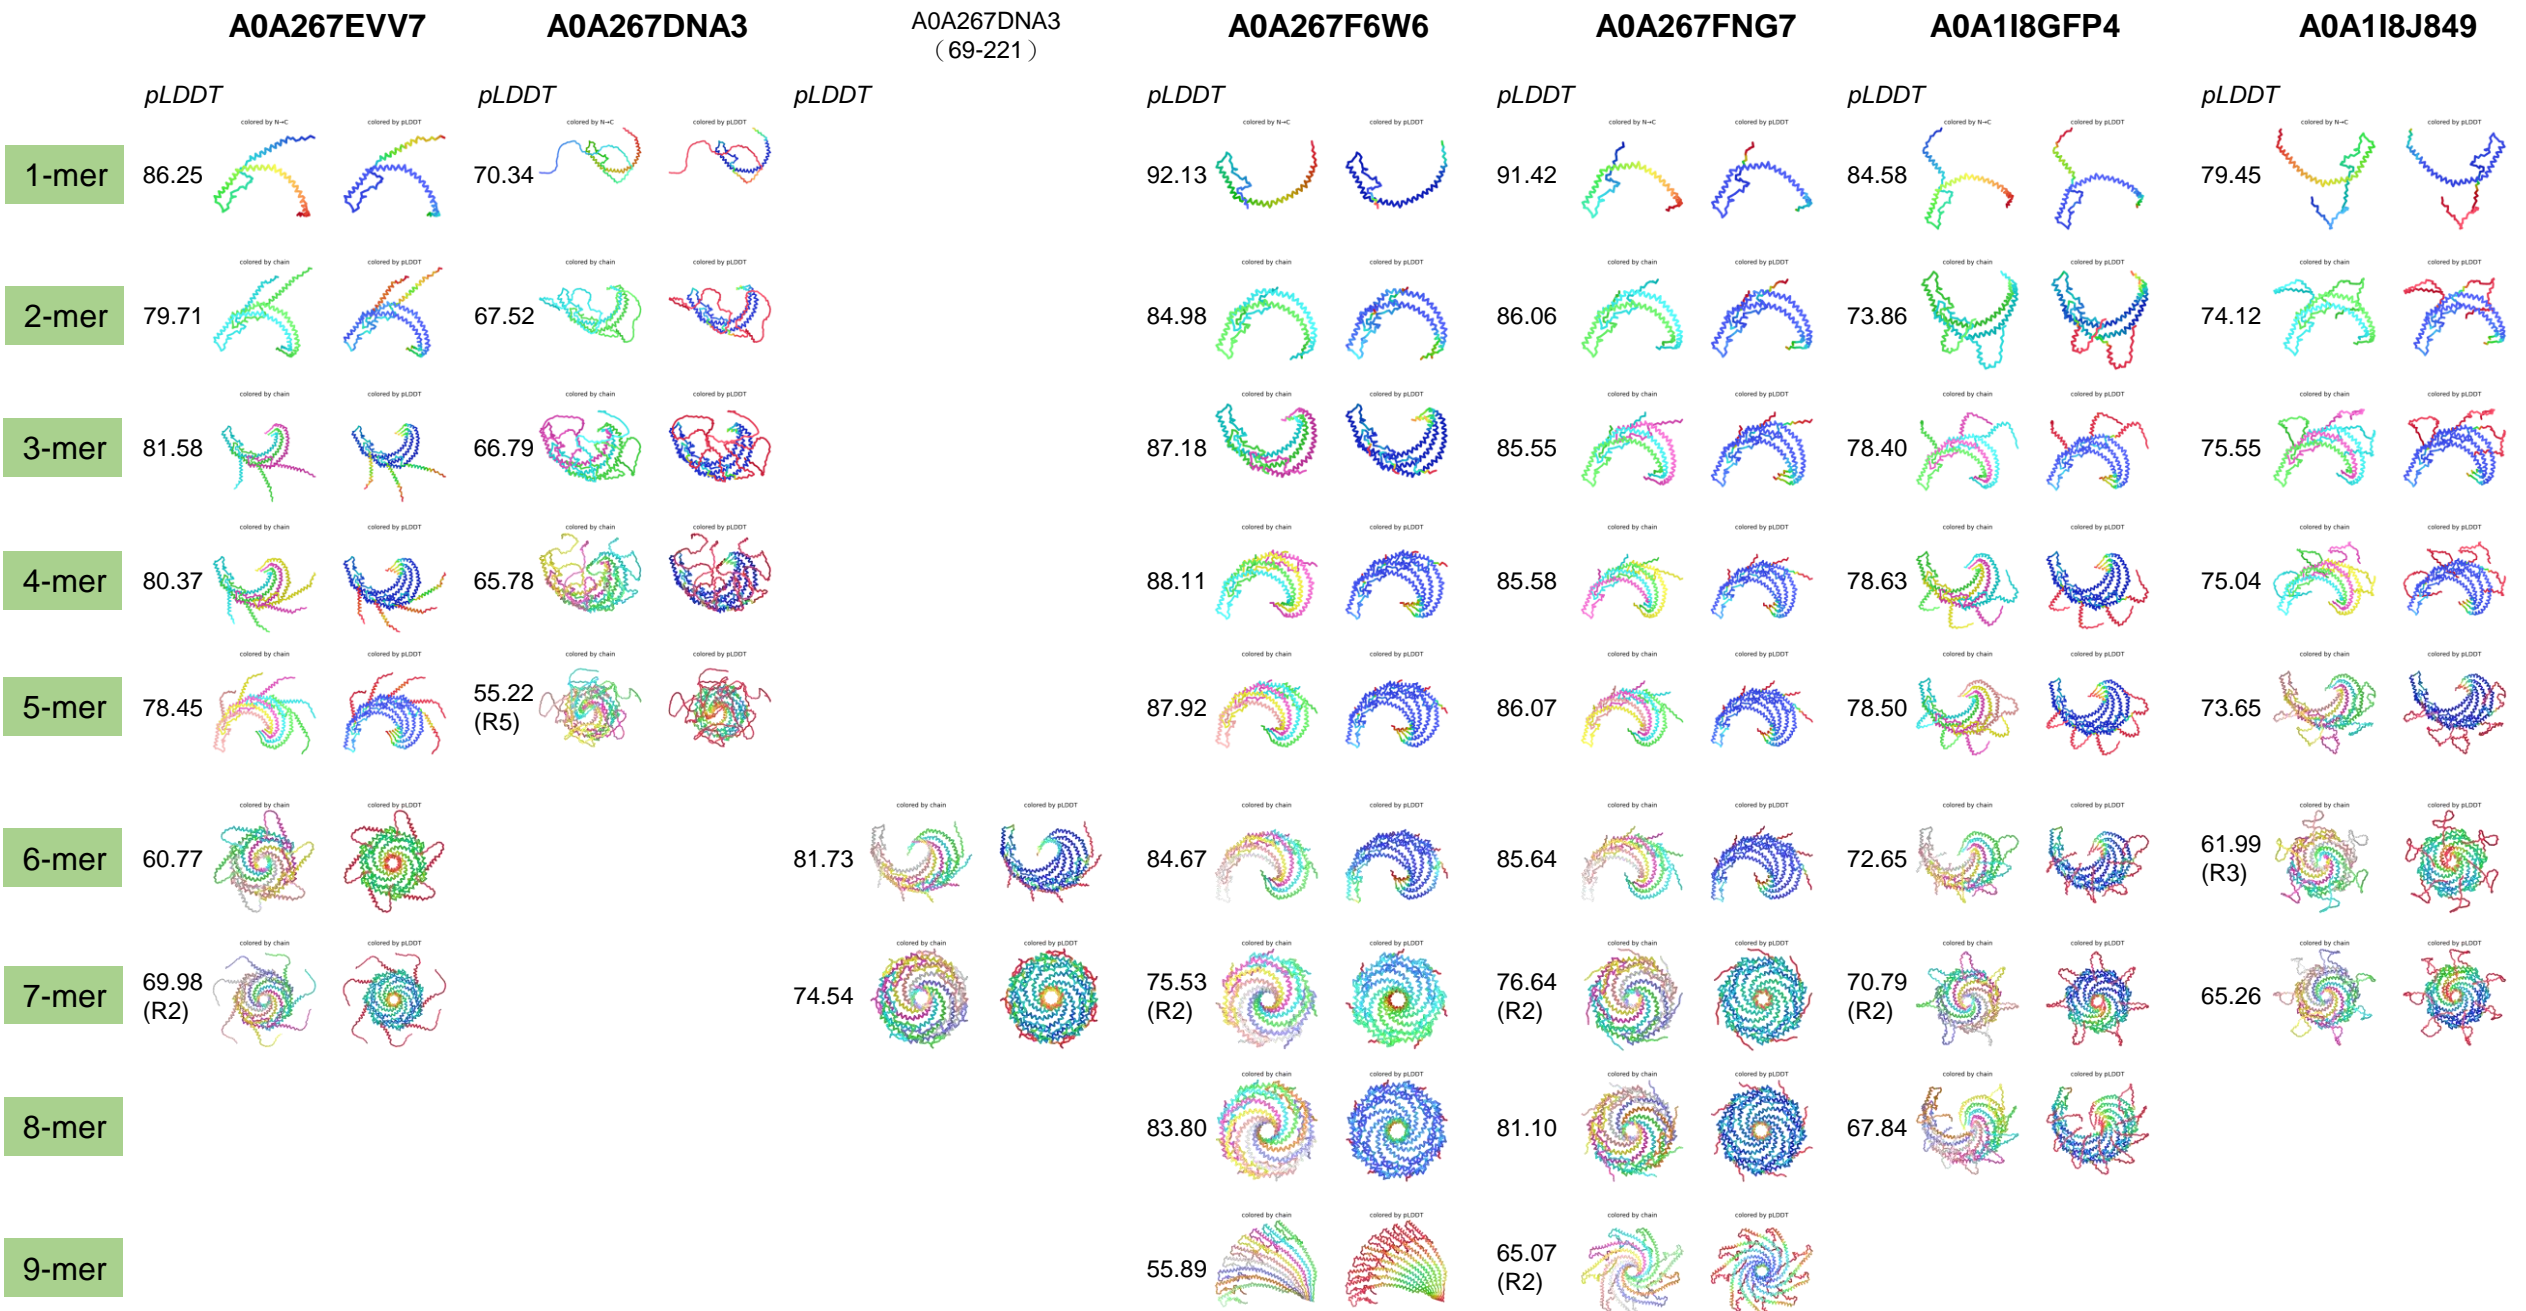

# Macrostomum lignano

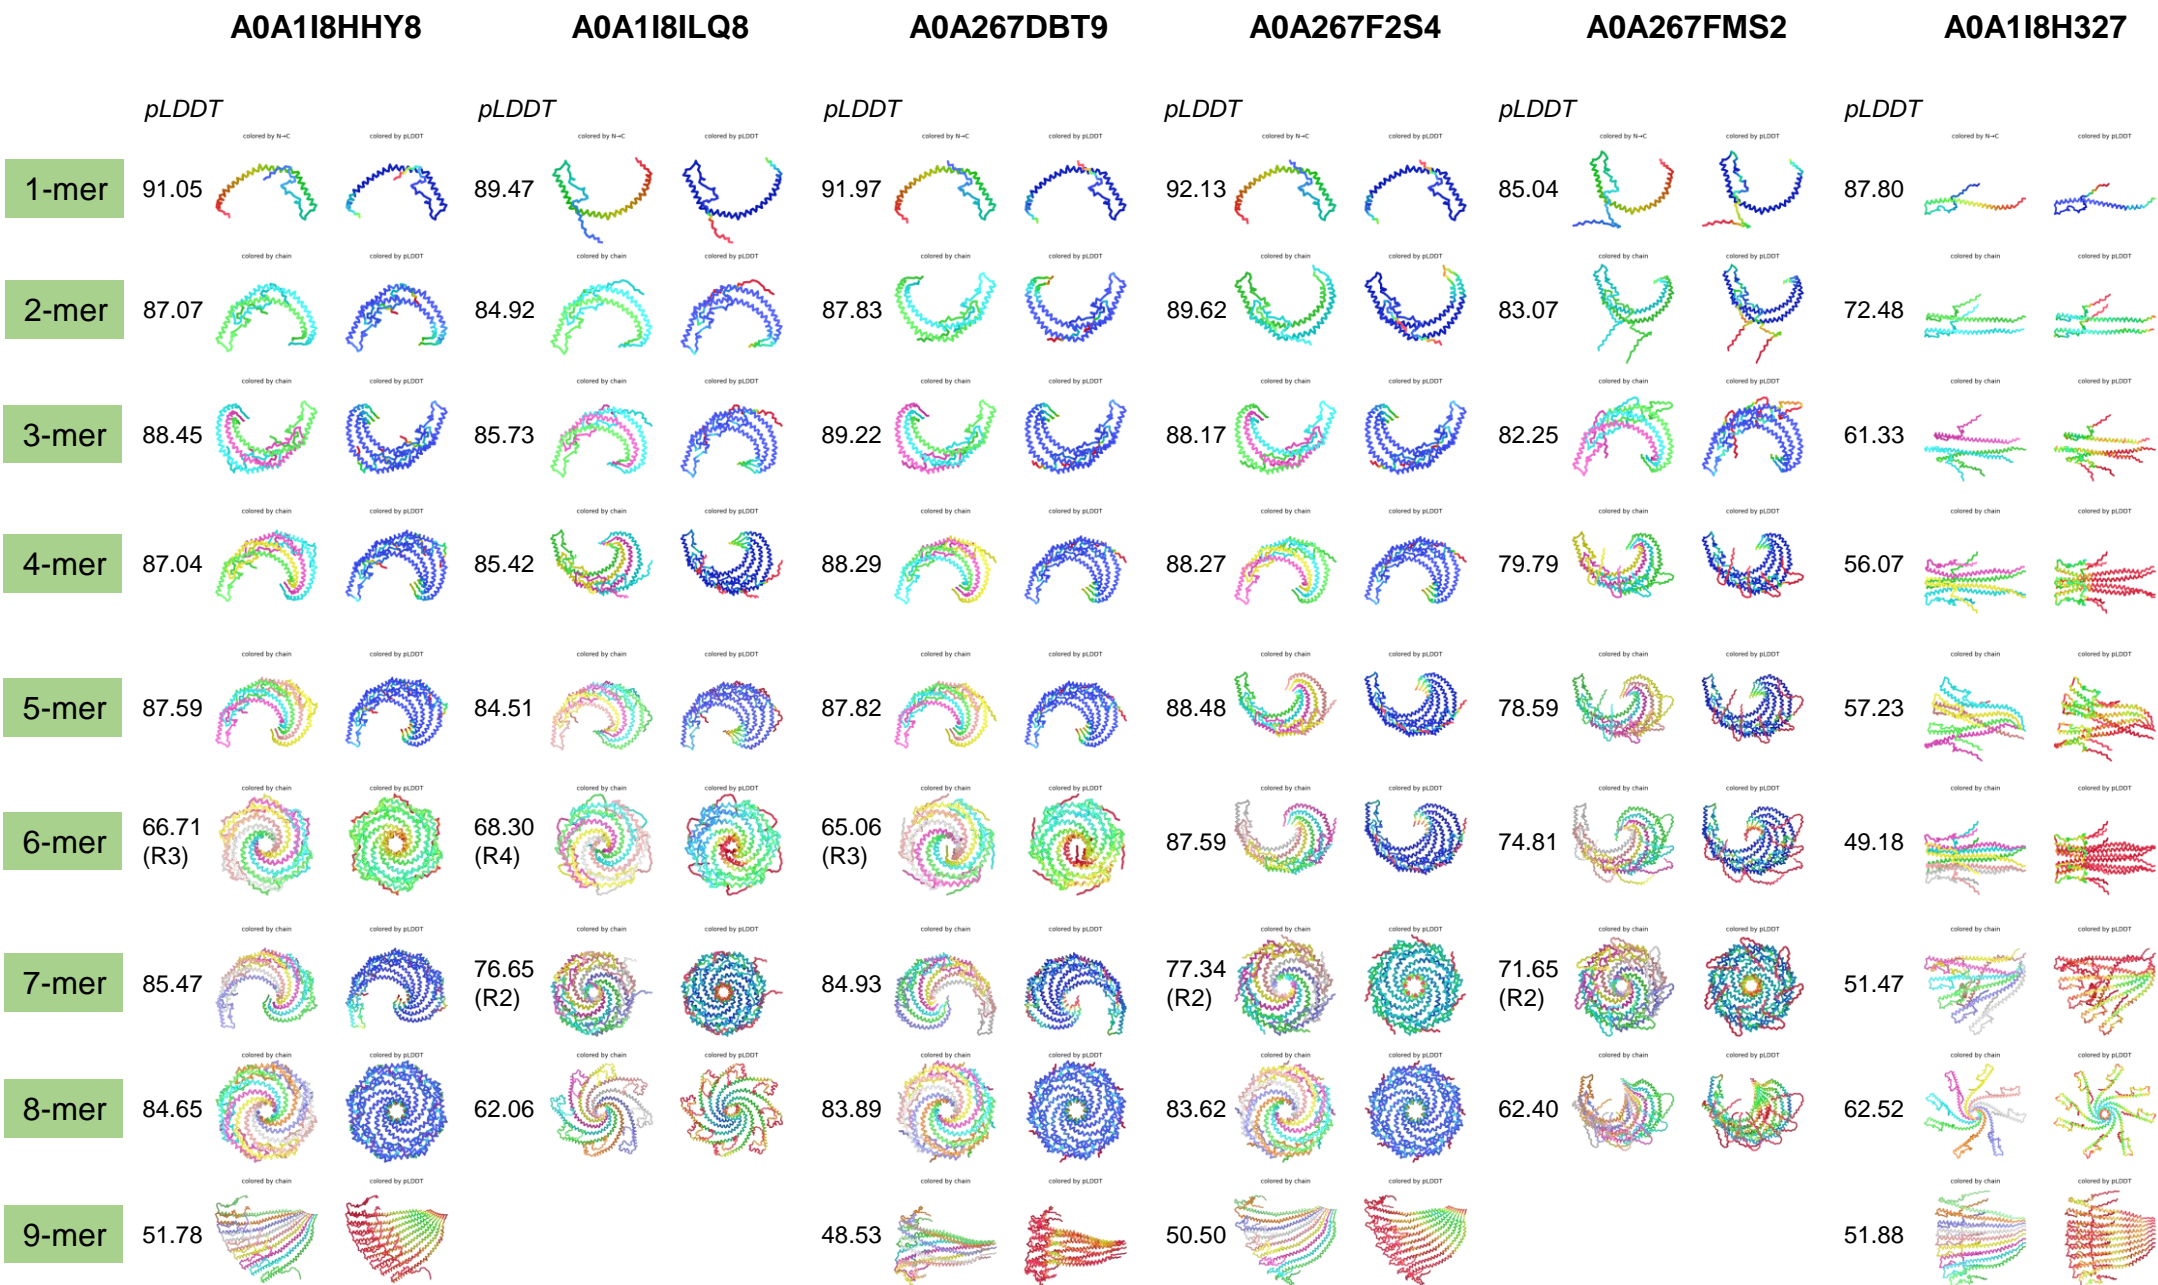

# Macrostomum lignano

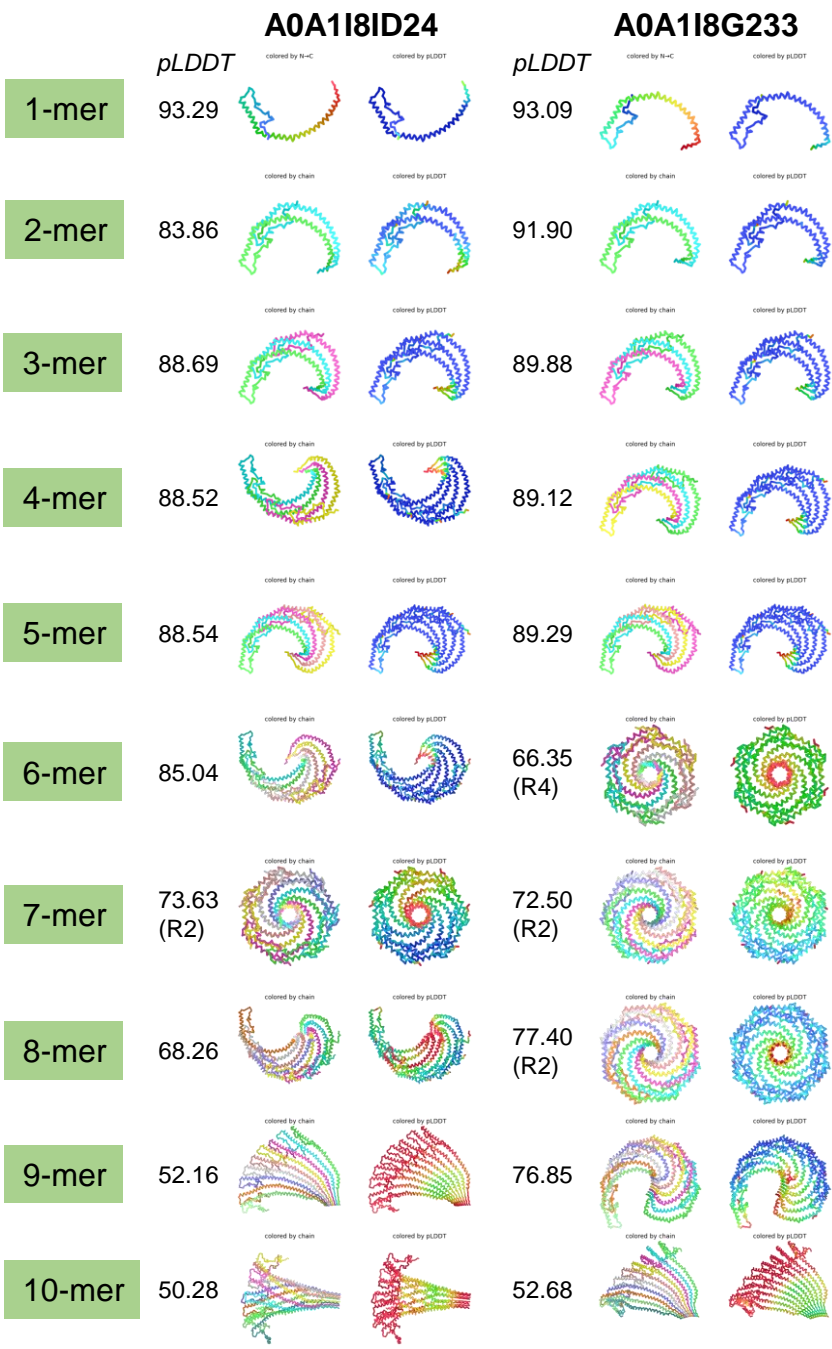

# *Pomacea canaliculata*

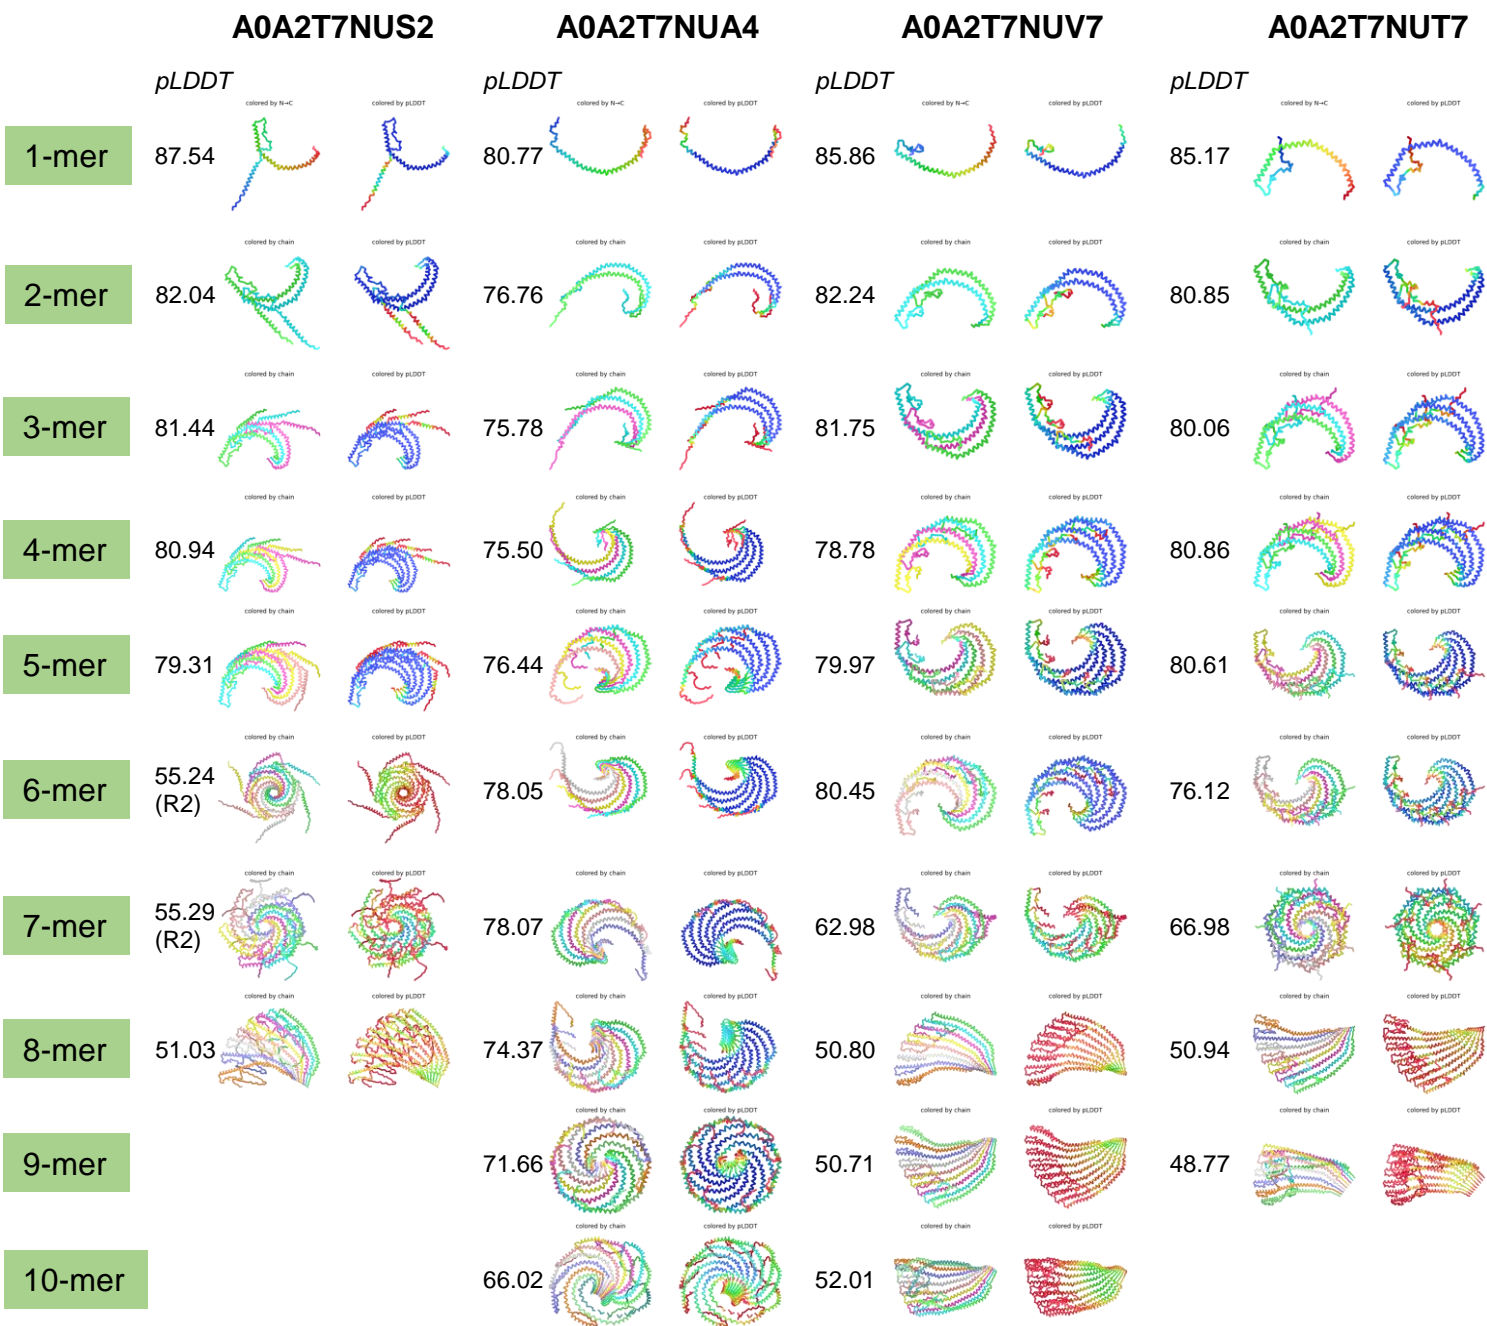

# Lingula unguis

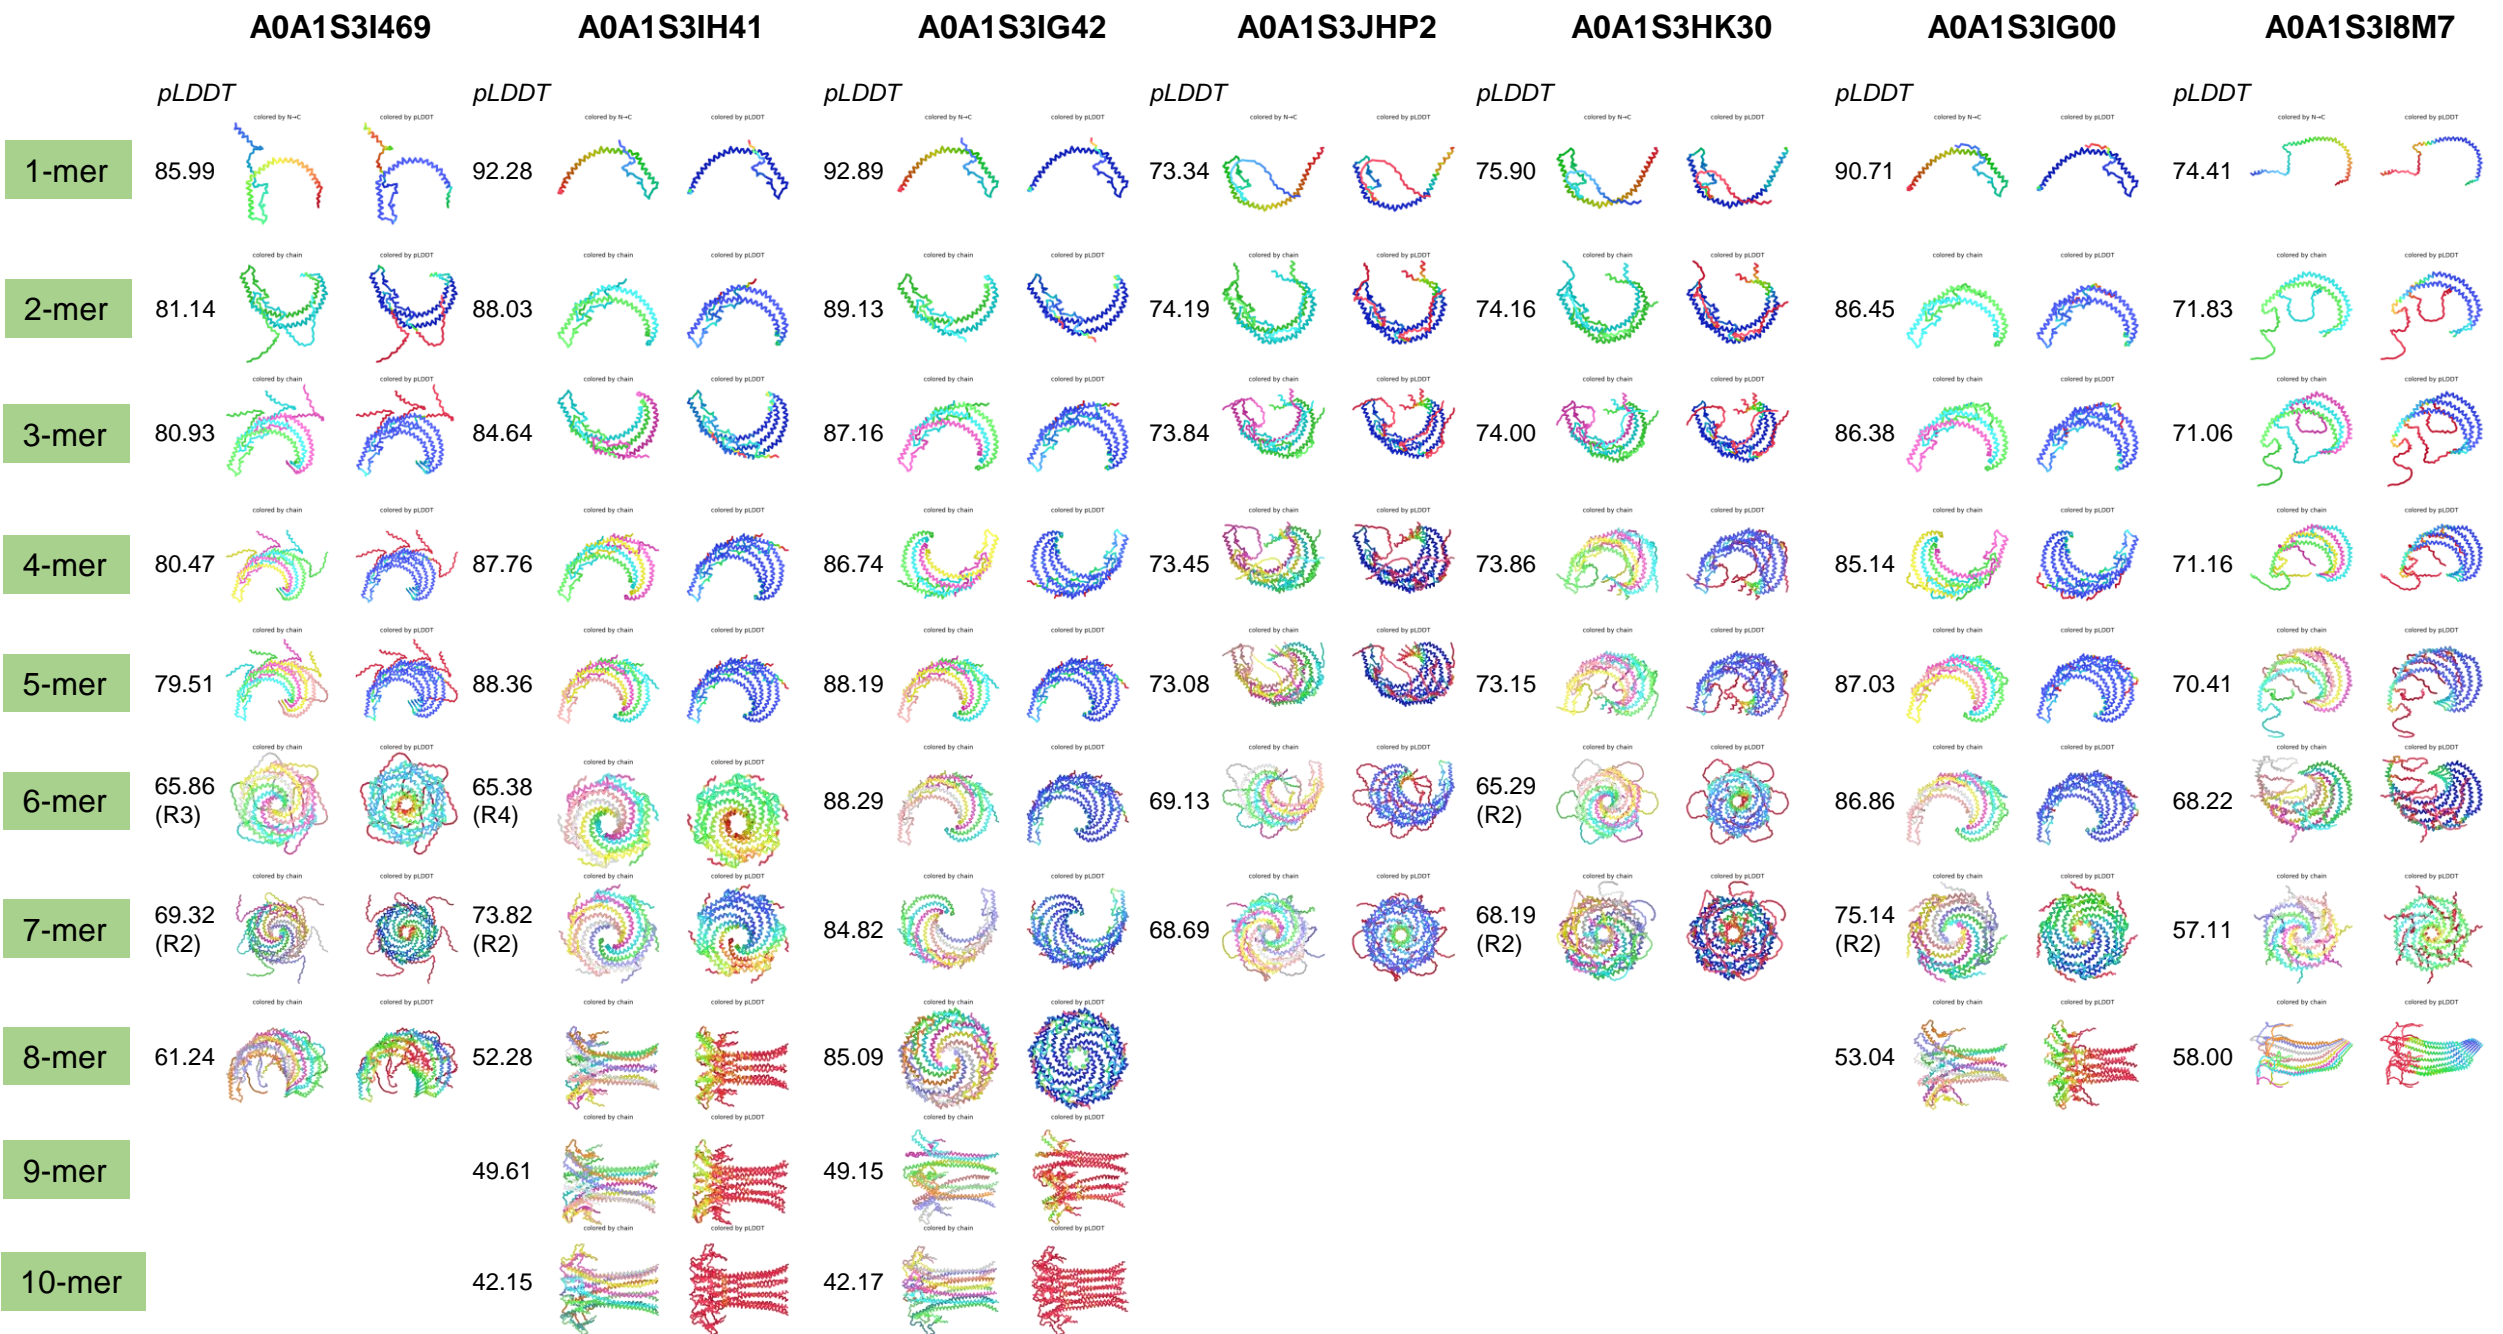



# Lingula unguis

## A0A1S3IQQ3

## A0A1S3IXS7

*pLDDT*

*pLDDT*

1-mer

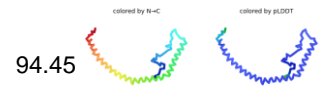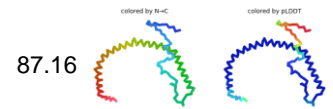

2-mer

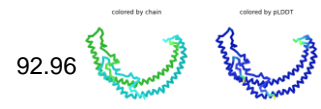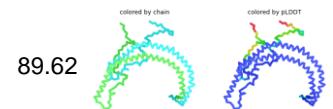

3-mer

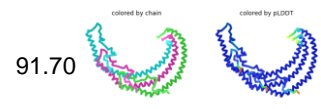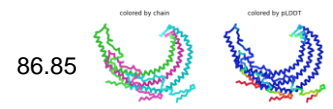

4-mer

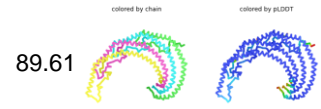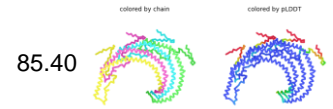

5-mer

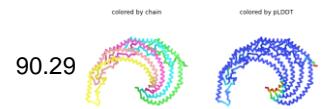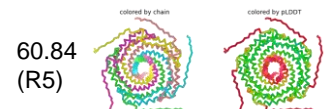

6-mer

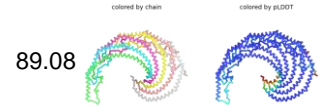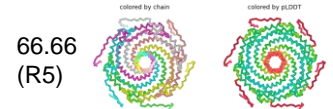

7-mer

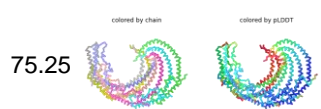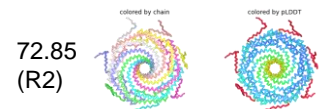

8-mer

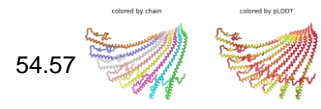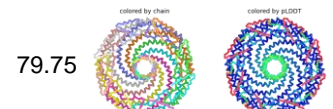

# Capitella teleta

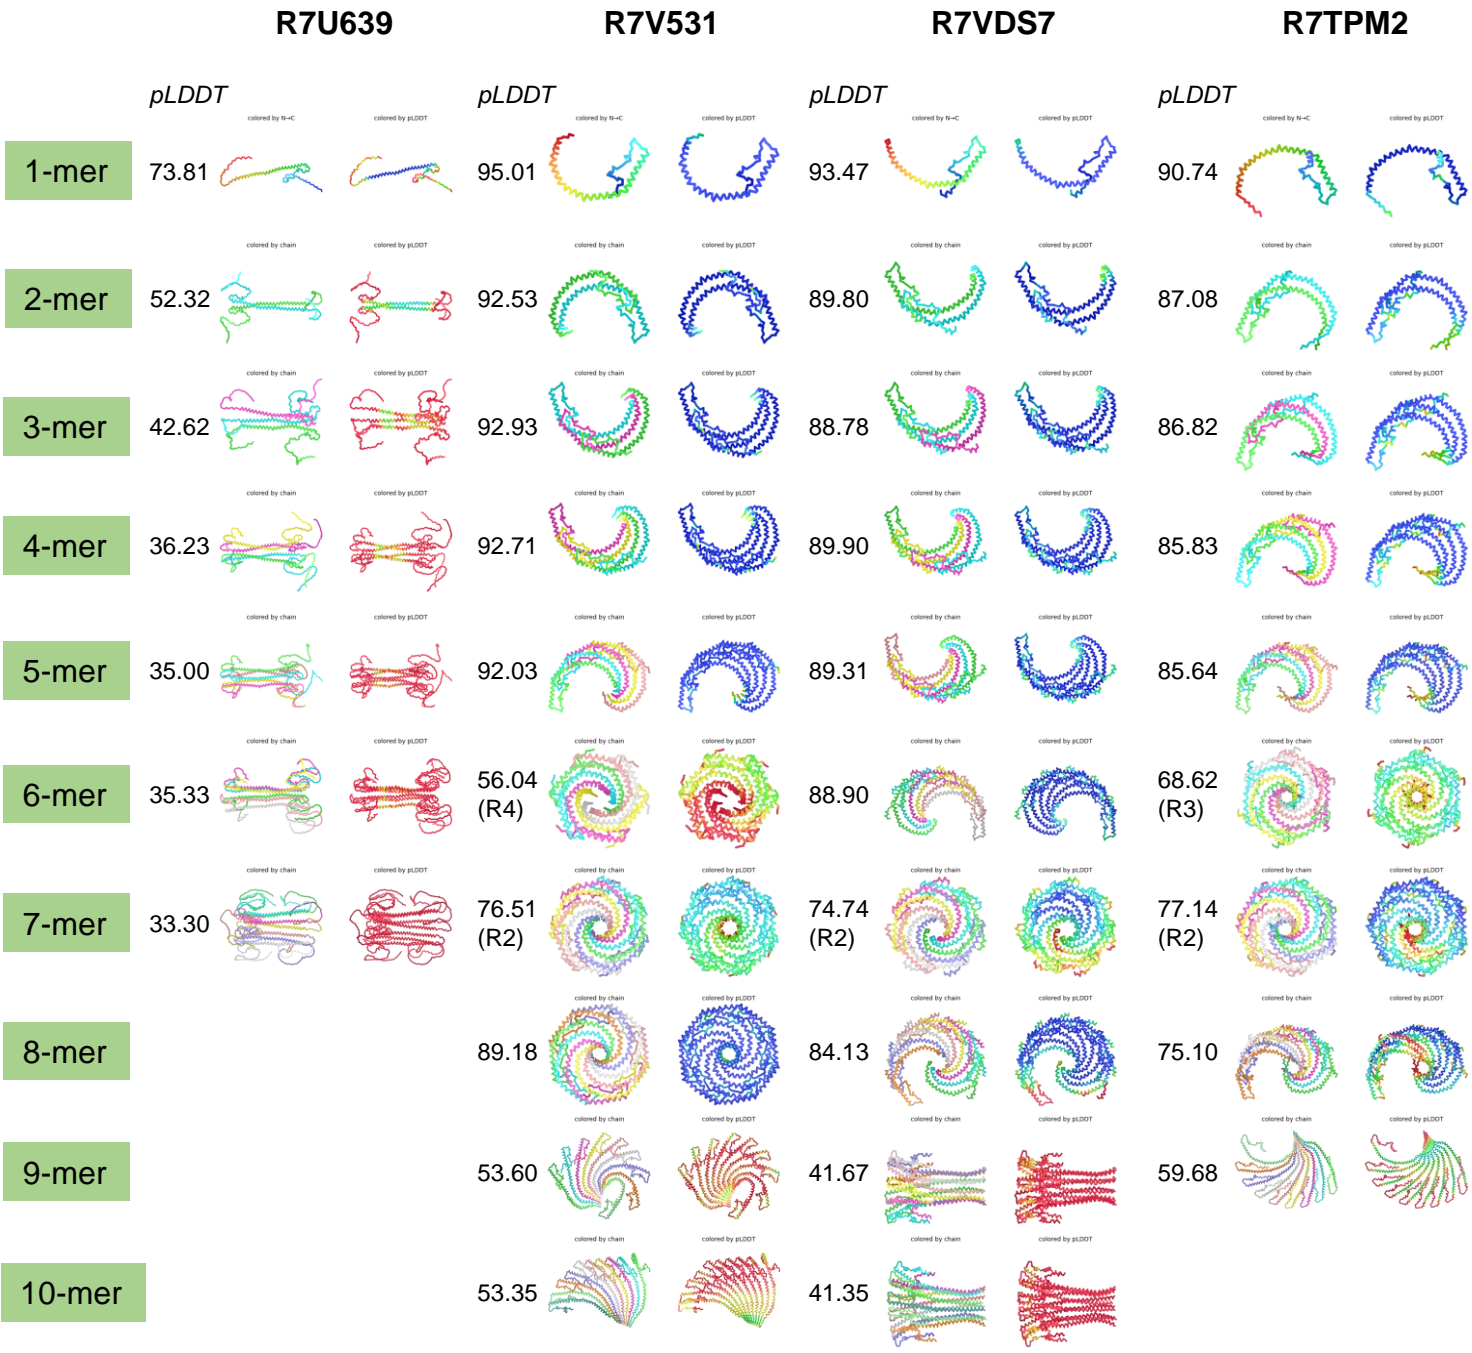

Supplement: Supplementary file [file media-1.pdf]
